# Supplementary material for: Spin–orbit charge transfer intersystem crossing and thermal activation delayed fluorescence (TADF) studies of compact orthogonal anthraquinone phenothiazine derivatives
Source: Royal Society of Chemistry journal article supplement (doi:10.1039/d3nj03488g), 2023-01-01
Supplement: d3nj03488g1.pdf [file d3nj03488g1.pdf]

## Electronic Supporting Information(ESI)

### **Spin-orbit charge transfer intersystem crossing and thermal activation delayed fluorescence (TADF) studies of compact orthogonal anthraquinone phenothiazine derivatives**

LingLing Lv,<sup>\*</sup> <sup>a</sup> Kun Yuan,<sup>a</sup> TianYu Zhao<sup>a</sup>, HuiXue Li<sup>a</sup> and DongMei Wang<sup>b</sup>

<sup>a</sup> *College of Chemical Engineering and Technology, Tianshui Normal University, Tianshui, Gansu 741001, China.*

<sup>b</sup> *College of Chemistry and Chemical Engineering, Baoji University of Arts and Sciences, Baoji, Shanxi 721013, China.*

---

<sup>\*</sup> Corresponding author: E-mail: lvling002@tsnu.edu.cn/lvling002@163.com

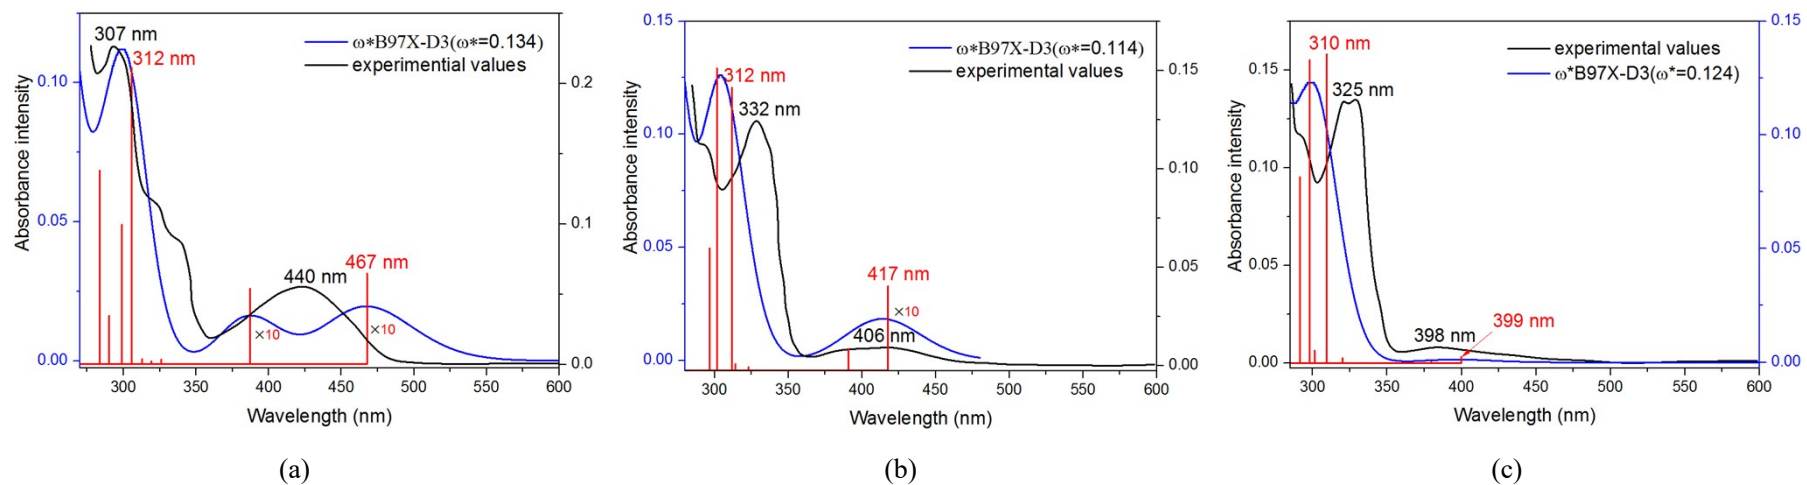

**Fig. S1** Comparison of the calculated and the experimental absorption spectra of (a) AQ-PTZ, (b) AQ-PTZ-O and (c) AQ-PTZ-O<sub>2</sub> in cyclohexane (with PCM mode), and calculated at the TD-DFT at the tuned- $\omega^*$ B97X-D3 level.

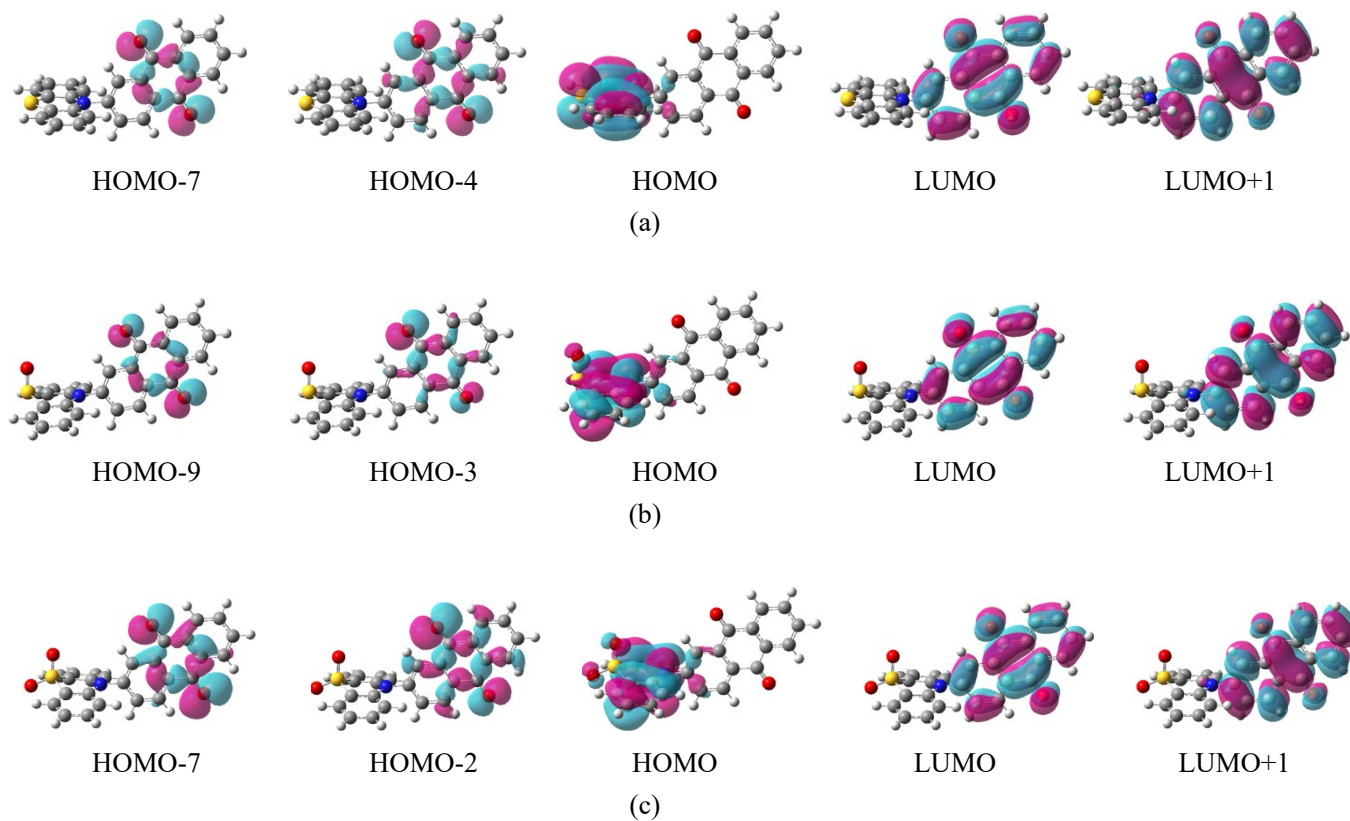

**Fig. S2** Key transition active orbitals of (a) AQ-PTZ, (b) AQ-PTZ-O, and (c) AQ-PTZ-O<sub>2</sub> compounds from the tuned- $\omega$ \*B97X-D3 level of theory in cyclohexane (with PCM mode).

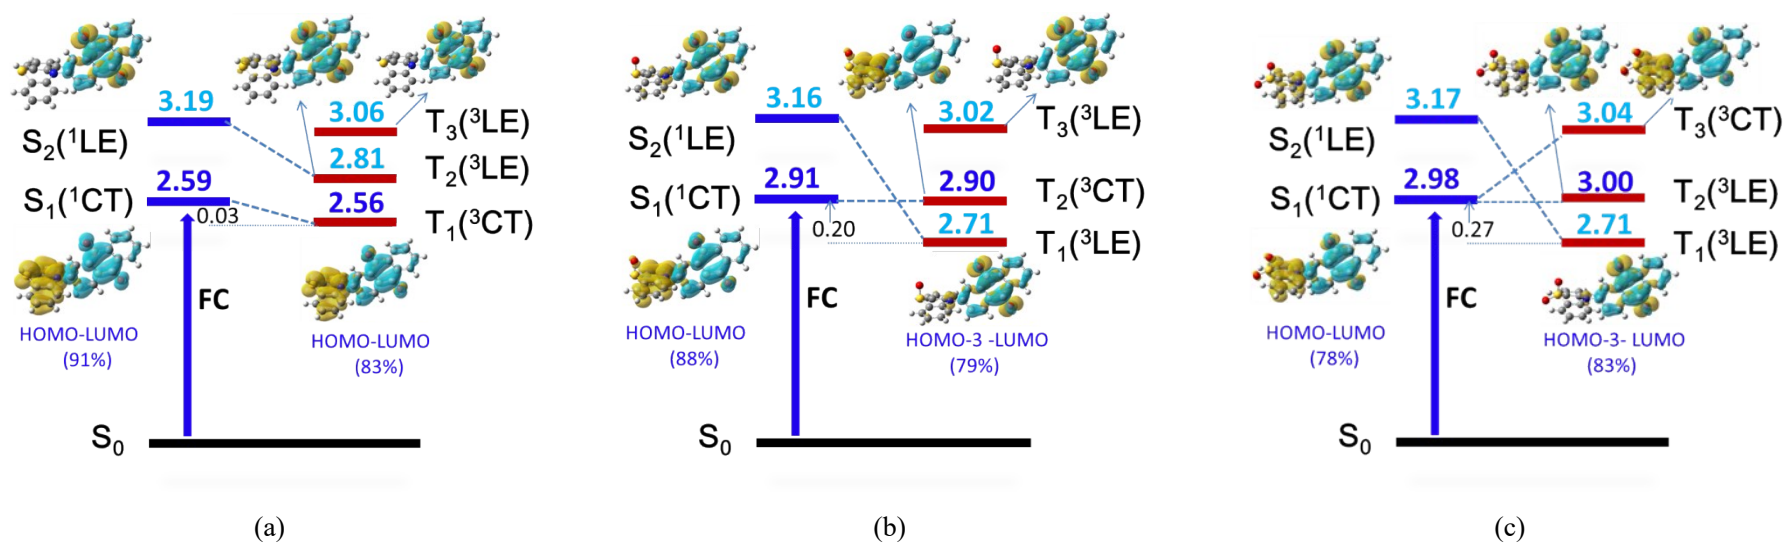

**Fig. S3** Adiabatic energy transition diagrams of (a) AQ-PTZ, (b) AQ-PTZ-O and (c) AQ-PTZ-O<sub>2</sub> are from calculation by the tuned- $\omega$ \*B97X-D3 level of theory in cyclohexane (with PCM mode). The density difference distributions of the excited states are inserted into the diagrams. CT: charge transfer. LE: Local excitation. FC: Franck-Condon.

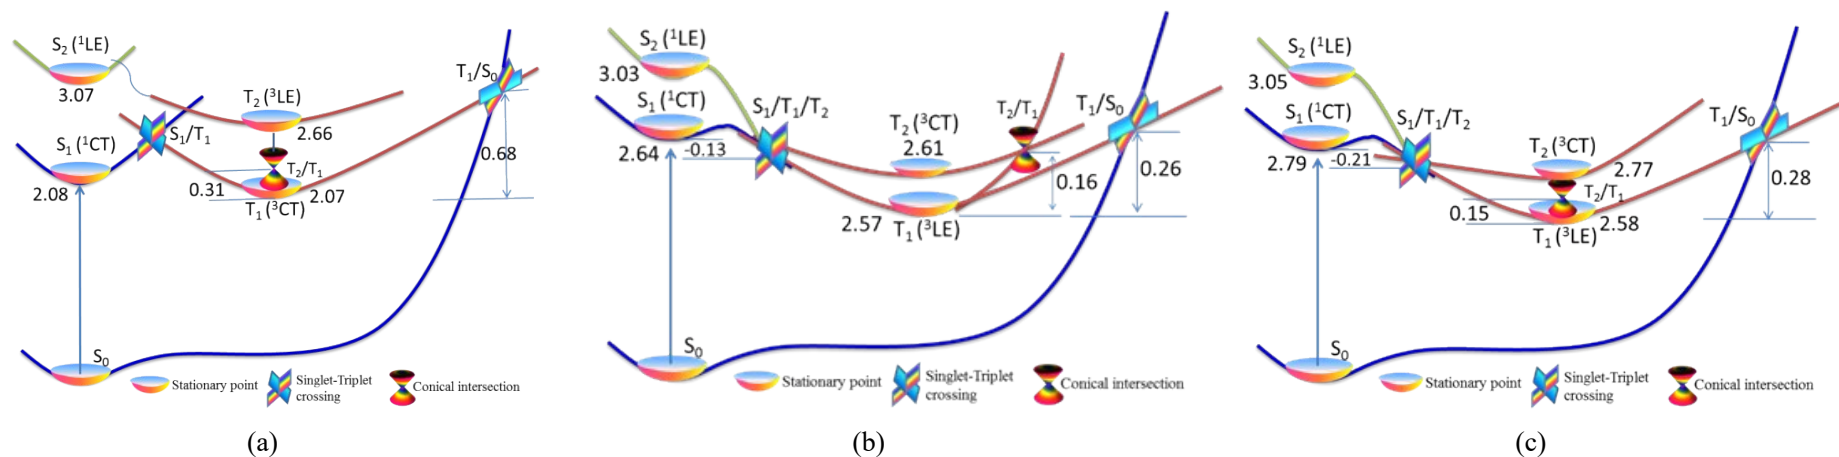

**Fig. S4** Nonabatic potential energy surface diagrams of (a) AQ-PTZ, (b) AQ-PTZ-O and (c) AQ-PTZ-O<sub>2</sub> are from single-point calculation at the tuned- $\omega$ \*B97X-D3 level of theory in cyclohexane (with PCM mode). Minimum energy crossing point (MECP) of different spin states (S<sub>1</sub>/T<sub>1</sub>, T<sub>1</sub>/S<sub>0</sub> and S<sub>1</sub>/T<sub>1</sub>/T<sub>2</sub>) and conical intersection of the same spin states (T<sub>2</sub>/T<sub>1</sub>) were also obtained.

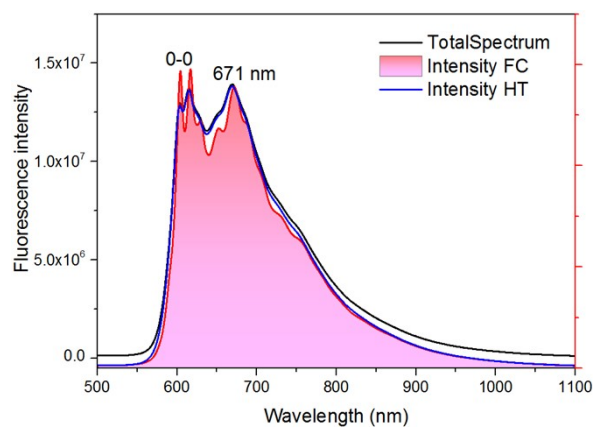

(a)

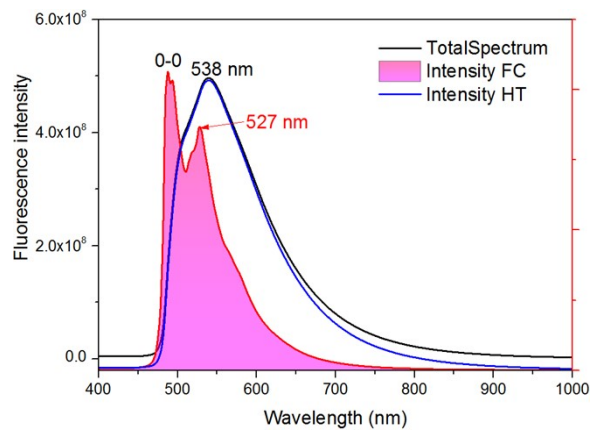

(b)

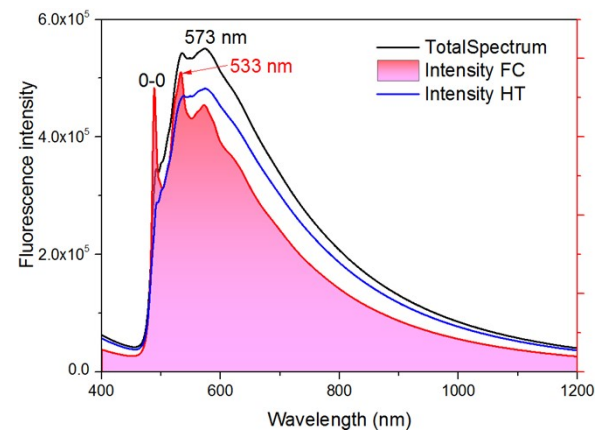

(c)

**Fig. S5** Calculated fluorescence emission spectrum of compounds (a) AQ-PTZ, (b) AQ-PTZ-O and (c) AQ-PTZ-O2 including FC and HT contributions from the tuned-TD- $\omega$ \*B97X-D3/ def2-tzvp(-f) //def2/J level at T = 300 K.

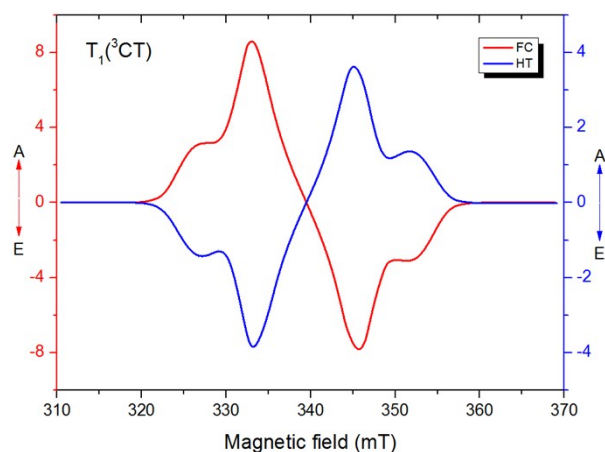

**Fig. S6** Simulated EPR spectra of the charge-transfer triplet  $T_1(^3CT)$  of the AQ-PTZ-O compound.

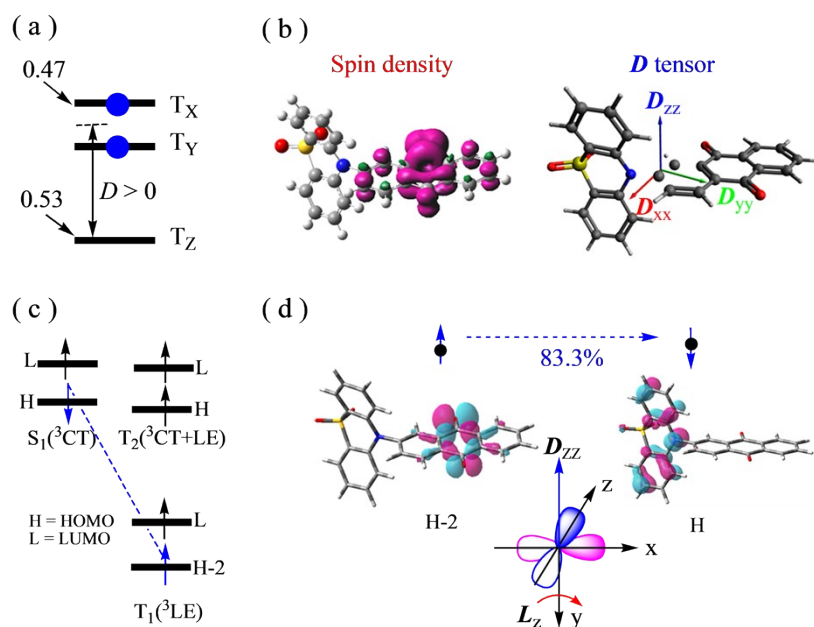

**Fig. S7** (a) Relative populations in the zero-field  $T_1(^3LE)$  spin sublevels obtained for  $D > 0$  of AQ-PTZ-O<sub>2</sub>; (b) Spin density and the ZFS tensor ( $D$ ) orientations of AQ-PTZ-O<sub>2</sub>; (c) Schematic representation of the  $S_1 \leftrightarrow T_1$  allowed ISC in AQ-PTZ-O<sub>2</sub>; (d) Representative topologies of the spin-flip orbitals are depicted between the H-2 and L orbitals, demonstrating that SOC is effective as the angular momentum change ( $L_z$ ) along the z-axis to cause the spin-flip.

**Table S1** Optimized coordinate parameters of (a) AQ-PTZ, (b) AQ-PTZ-O, and (c) AQ-PTZ-O<sub>2</sub> compounds from the CAM-B3LYP level of theory in cyclohexane (with PCM mode) for the S<sub>0</sub>, S<sub>1</sub>, S<sub>2</sub>, T<sub>1</sub> and T<sub>2</sub> states.

| AQ-PTZ                                |                   |                   |                   |                                       |                   |                   |                   |
|---------------------------------------|-------------------|-------------------|-------------------|---------------------------------------|-------------------|-------------------|-------------------|
| Coordinates from S <sub>0</sub> state |                   |                   |                   | Coordinates from S <sub>1</sub> state |                   |                   |                   |
| C                                     | -2.44887600167903 | 3.57457507364198  | -0.83092559612766 | C                                     | -2.21569661538571 | 3.63193022476594  | -0.41425085435792 |
| C                                     | -1.76812620302903 | 2.36933982558048  | -0.78351736581714 | C                                     | -1.62263384643194 | 2.40528065468759  | -0.54092985529014 |
| C                                     | -2.36584092362406 | 1.23061589010157  | -0.25150367671612 | C                                     | -2.36274856801322 | 1.22442438821502  | -0.35174798325480 |
| C                                     | -3.66691804839773 | 1.34194046568377  | 0.24374914027786  | C                                     | -3.72938205767901 | 1.34698245950966  | -0.03157293166504 |
| C                                     | -4.35449353289686 | 2.54021036543743  | 0.15692930941200  | C                                     | -4.31530614661516 | 2.60692799561493  | 0.09736517924591  |
| C                                     | -3.74859603979579 | 3.66666088874441  | -0.37164368147638 | C                                     | -3.57017626608303 | 3.74129182814680  | -0.09065719425134 |
| C                                     | -3.66694636994721 | -1.34186740720896 | 0.24369919556419  | C                                     | -3.72943111734470 | -1.34697072173835 | -0.03187175357863 |
| C                                     | -2.36587322116853 | -1.23054425877383 | -0.25155875264085 | C                                     | -2.36278978885336 | -1.22439111544302 | -0.35199983605474 |
| C                                     | -1.76819280717088 | -2.36924471429521 | -0.78366274604843 | C                                     | -1.62271931482403 | -2.40523023287789 | -0.54145831079088 |
| H                                     | -0.75621033258494 | -2.32688517883775 | -1.15391712222300 | H                                     | -0.57668496001281 | -2.33663929824127 | -0.78563158467562 |
| C                                     | -2.44896584892927 | -3.57446456372112 | -0.83112662156764 | C                                     | -2.21583478175326 | -3.63188671337955 | -0.41509351725585 |
| C                                     | -3.74867653728928 | -3.66655284761896 | -0.37181741684600 | C                                     | -3.57032381095596 | -3.74127134662101 | -0.09155222631483 |
| C                                     | -4.35454483976918 | -2.54012022080317 | 0.15682763290776  | C                                     | -4.31541076127291 | -2.60692381707030 | 0.09674237358423  |
| H                                     | -1.95130021583249 | 4.44313753635149  | -1.24063637680484 | H                                     | -1.62271313577316 | 4.52246552843743  | -0.56510824687505 |
| H                                     | -0.75612946373942 | 2.32699149285957  | -1.15373212514640 | H                                     | -0.57660402317088 | 2.33670708442956  | -0.78512617927176 |
| H                                     | -5.36835054985791 | 2.58920365395509  | 0.53229040718389  | H                                     | -5.36539418659674 | 2.67322222783822  | 0.34913842728270  |
| H                                     | -4.28731453823973 | 4.60277127151599  | -0.41654666386038 | H                                     | -4.03023254115238 | 4.71352238383772  | 0.01184665260769  |
| H                                     | -1.95141806844868 | -4.44301251542922 | -1.24090251349261 | H                                     | -1.62288765412823 | -4.52240943592900 | -0.56616883254783 |
| H                                     | -4.28741205855825 | -4.60265159733714 | -0.41675942685772 | H                                     | -4.03042455364327 | -4.71350814046899 | 0.01069000329341  |
| H                                     | -5.36839908359279 | -2.58911501495701 | 0.53219635118194  | H                                     | -5.36550758070040 | -2.67323860654269 | 0.34847535838726  |
| N                                     | -1.67985060054993 | 0.00002496937653  | -0.18419786549254 | N                                     | -1.73719775688421 | 0.00001829081795  | -0.47493755764584 |
| S                                     | -4.40968714911097 | 0.00002854876758  | 1.10244783806594  | S                                     | -4.76161029717248 | -0.00000488421030 | 0.23392728893957  |
| C                                     | 7.12239822135522  | 0.00021106422615  | 0.41990214585117  | C                                     | 6.98886570227391  | 0.00006187247373  | 0.43181155788545  |
| C                                     | 6.19696187101204  | 0.00015452653201  | -0.60542986821521 | C                                     | 6.10370756270815  | -0.00008695986501 | -0.61754012470327 |
| C                                     | 4.83918549598783  | -0.00007811549311 | -0.31796139719227 | C                                     | 4.72250271886886  | -0.00010144559799 | -0.39248900637962 |
| C                                     | 4.41143018895660  | -0.00025669555675 | 1.00977797184350  | C                                     | 4.24396020611374  | -0.00000569750560 | 0.92963759051361  |
| C                                     | 5.34689433975361  | -0.00020055399307 | 2.03493602556655  | C                                     | 5.16127155593764  | 0.00016971460281  | 1.98719545512275  |
| C                                     | 6.69675926934023  | 0.00003035804314  | 1.74126776673394  | C                                     | 6.51267249106917  | 0.00020171402855  | 1.74673018042030  |
| C                                     | 3.86612914840582  | -0.00015921271419 | -1.43838337571829 | C                                     | 3.81726551999572  | -0.00009649707861 | -1.54931989424519 |
| C                                     | 2.96687642757023  | -0.00050517327808 | 1.35147817617101  | C                                     | 2.80991072698162  | -0.00019710040132 | 1.23298215887855  |
| C                                     | 1.99278601829144  | -0.00025296968669 | 0.22846824020353  | C                                     | 1.92355017758634  | -0.00006789121413 | 0.09260469959440  |
| C                                     | 2.41983978899692  | -0.00010431170918 | -1.09669271920945 | C                                     | 2.40051902337861  | -0.00011635093143 | -1.24961007699619 |
| C                                     | 1.48323826494047  | 0.00008107607375  | -2.12227928003856 | C                                     | 1.47760559193871  | -0.00009974106467 | -2.30223756474745 |
| H                                     | 1.83034864036051  | 0.00018444590823  | -3.14543317844960 | H                                     | 1.86770778217623  | -0.00012139705802 | -3.31061178013123 |
| C                                     | 0.13661268473501  | 0.00012171146480  | -1.82909268446768 | C                                     | 0.12588255635738  | -0.00002523832050 | -2.07506647361042 |
| C                                     | -0.28913595047564 | -0.00000459192863 | -0.50499661269964 | C                                     | -0.31972615118874 | 0.00001311598298  | -0.73925537069056 |
| C                                     | 0.63517244926693  | -0.00019850327771 | 0.51805155692829  | C                                     | 0.54344333909411  | 0.00000187963640  | 0.31499629534851  |
| H                                     | 8.17970536084109  | 0.00039425395946  | 0.19186262759890  | H                                     | 8.05433875752093  | 0.00009096044047  | 0.24294558507403  |
| H                                     | 6.50910326944847  | 0.00028894109516  | -1.63995332754116 | H                                     | 6.44820368725534  | -0.00014900506620 | -1.64195518707262 |



|                                             |                   |                   |                   |                                             |                   |                   |                    |
|---------------------------------------------|-------------------|-------------------|-------------------|---------------------------------------------|-------------------|-------------------|--------------------|
| H                                           | 4.99726603682659  | -0.00033873589567 | 3.05743020438257  | H                                           | 4.77068781287683  | 0.00022628630278  | 2.99487788499517   |
| H                                           | 7.42247408180908  | 0.00007582335867  | 2.54327901605533  | H                                           | 7.21064319385528  | 0.00031653292994  | 2.57372475766546   |
| H                                           | -0.59917794488485 | 0.00025149177721  | -2.62219333701304 | H                                           | -0.58593456931785 | -0.00001641718364 | -2.88843510335699  |
| H                                           | 0.30822056880639  | -0.00030935044762 | 1.54793296528117  | H                                           | 0.18545925674342  | -0.00000327709460 | 1.33571937647787   |
| O                                           | 2.59070937822864  | -0.00042324014146 | 2.50283676782227  | O                                           | 2.38543342582227  | 0.00062201552816  | 2.40358400386194   |
| O                                           | 4.23442582463936  | 0.00029409865002  | -2.59283660736919 | O                                           | 4.24984039639923  | -0.00061782732262 | -2.71270438341496  |
| <b>Coordinates from S<sub>2</sub> state</b> |                   |                   |                   | <b>Coordinates from T<sub>1</sub> state</b> |                   |                   |                    |
| C                                           | -2.46535326130228 | 3.56339220455097  | -0.86380988328287 | C                                           | -2.21890357759309 | 3.63510466930525  | -0.445057923267842 |
| C                                           | -1.77945311644409 | 2.36125114892768  | -0.82635780206611 | C                                           | -1.62717693565310 | 2.40629828346279  | -0.57010499655796  |
| C                                           | -2.35532833192397 | 1.22829350855035  | -0.25902048195686 | C                                           | -2.36251609244147 | 1.22647227697318  | -0.35371077935866  |
| C                                           | -3.63897279420766 | 1.34078679754725  | 0.28000898295064  | C                                           | -3.72312711539195 | 1.34971319520315  | -0.00606869335561  |
| C                                           | -4.33257971786023 | 2.53676258579656  | 0.20544447308864  | C                                           | -4.30699525004476 | 2.61192452979075  | 0.12155166850655   |
| C                                           | -3.74825189198107 | 3.65752754886130  | -0.35774013274641 | C                                           | -3.56735632405198 | 3.74610279712217  | -0.09451832395105  |
| C                                           | -3.63853266197891 | -1.34078214473708 | 0.28020464436575  | C                                           | -3.72298102250454 | -1.34973121336853 | -0.00615322546205  |
| C                                           | -2.35494051840395 | -1.22792330783455 | -0.25887763443261 | C                                           | -2.36238792975557 | -1.22632112906342 | -0.35381316605451  |
| C                                           | -1.77870780968526 | -2.36077278667958 | -0.82608828690852 | C                                           | -1.62694224174739 | -2.40605652207321 | -0.57034887016779  |
| H                                           | -0.78142805876021 | -2.31240103155677 | -1.23403646429093 | H                                           | -0.58525026451447 | -2.33601560250096 | -0.83592220929839  |
| C                                           | -2.46420528680245 | -3.56314892695356 | -0.86335657442995 | C                                           | -2.21854044751156 | -3.63493251775028 | -0.44538252936259  |
| C                                           | -3.74704911456151 | -3.65764978737394 | -0.35721965826916 | C                                           | -3.56696613799742 | -3.74609684894926 | -0.09479480519089  |
| C                                           | -4.33173126593774 | -2.53700699990065 | 0.20583499212330  | C                                           | -4.30671547619069 | -2.61201272754689 | 0.12138847300040   |
| H                                           | -1.98691798340298 | 4.42818741699408  | -1.30317874536080 | H                                           | -1.62971478088636 | 4.52481881282517  | -0.61952347228165  |
| H                                           | -0.78213574924900 | 2.31315120871855  | -1.23426965967010 | H                                           | -0.58546241510356 | 2.33637875690608  | -0.83562631942707  |
| H                                           | -5.33285448971745 | 2.58794200730940  | 0.61530053970493  | H                                           | -5.35250398585960 | 2.68116648741861  | 0.39339185019979   |
| H                                           | -4.29075591393787 | 4.59180095819080  | -0.39532645401855 | H                                           | -4.02760532741965 | 4.71937559561591  | 0.00579588865917   |
| H                                           | -1.98549767888341 | -4.42784233045926 | -1.30262962508035 | H                                           | -1.62927033243364 | -4.52457107124957 | -0.61995880021816  |
| H                                           | -4.28923232562455 | -4.59211611870712 | -0.39464087134849 | H                                           | -4.02711200823660 | -4.71942482027022 | 0.00545631311342   |
| H                                           | -5.33197488933342 | -2.58847186440293 | 0.61573304112472  | H                                           | -5.35221029209528 | -2.68138455550940 | 0.39324903580529   |
| N                                           | -1.66640750434014 | 0.00030922079196  | -0.20104462625498 | N                                           | -1.73732592921480 | 0.00011434793405  | -0.47683468646003  |
| S                                           | -4.34528133200413 | -0.00004891360649 | 1.17066094753512  | S                                           | -4.74795690753391 | -0.00007410251418 | 0.29724270357080   |
| C                                           | 7.10072394472639  | -0.00075201256879 | 0.44241116332637  | C                                           | 6.98509380207270  | -0.00023644844687 | 0.44092949221837   |
| C                                           | 6.18733941306224  | -0.00030500164730 | -0.58545062043253 | C                                           | 6.10198685104631  | -0.00009339106847 | -0.61022929654653  |
| C                                           | 4.81709843628047  | -0.00010244693472 | -0.32149002674761 | C                                           | 4.72235486223442  | -0.00005944652978 | -0.38634946920667  |
| C                                           | 4.38069752045251  | -0.00035778443133 | 1.00604967314608  | C                                           | 4.24191571039223  | -0.00016907996981 | 0.93304382329398   |
| C                                           | 5.31651802261293  | -0.00081553561248 | 2.05073935715052  | C                                           | 5.15502347975250  | -0.00031537691539 | 1.99184417832358   |
| C                                           | 6.65975096727097  | -0.00099756241117 | 1.76685957681192  | C                                           | 6.50684745244725  | -0.00035212112748 | 1.75365865866614   |
| C                                           | 3.87617592476161  | 0.00052440027113  | -1.44946813632724 | C                                           | 3.81745424840379  | 0.00005510154692  | -1.54313051224524  |
| C                                           | 2.96402651754840  | -0.00019366393305 | 1.31025581142172  | C                                           | 2.80711149302266  | -0.00011557447899 | 1.23354789545759   |
| C                                           | 2.01071901620475  | 0.00026100546719  | 0.22305766048963  | C                                           | 1.92066214248416  | 0.00002774888900  | 0.09358832116817   |
| C                                           | 2.44956048064016  | 0.00053892732735  | -1.10401433087097 | C                                           | 2.39925380675893  | 0.00014729227996  | -1.24592244540411  |
| C                                           | 1.50371769007422  | 0.00087449523357  | -2.13061763845896 | C                                           | 1.48075012206124  | 0.00032289440169  | -2.29841942894893  |
| H                                           | 1.86291866739788  | 0.00110344471736  | -3.15036321071708 | H                                           | 1.87283805171790  | 0.00041937649782  | -3.30551807979082  |
| C                                           | 0.16005278258080  | 0.00086323264570  | -1.84969992073489 | C                                           | 0.12808812851541  | 0.00035019826377  | -2.07250600143543  |
| C                                           | -0.27421692522034 | 0.00049998029850  | -0.51945821353191 | C                                           | -0.32059920961070 | 0.00018829257903  | -0.73955773879334  |
| C                                           | 0.63666762482484  | 0.00024432853991  | 0.50473548172096  | C                                           | 0.54179748989280  | 0.00003832798258  | 0.31564450268893   |

|                                             |                   |                   |                   |                                                              |                   |                   |                   |
|---------------------------------------------|-------------------|-------------------|-------------------|--------------------------------------------------------------|-------------------|-------------------|-------------------|
| H                                           | 8.15982977102801  | -0.00090818574596 | 0.22406290867050  | H                                                            | 8.05024524234775  | -0.00026667935819 | 0.25413078278243  |
| H                                           | 6.50171002402728  | -0.00008320210008 | -1.62005799078359 | H                                                            | 6.44737933431262  | -0.00001291198602 | -1.63372031125141 |
| H                                           | 4.96332836793718  | -0.00100941052335 | 3.07265398535550  | H                                                            | 4.76169351039079  | -0.00039602291353 | 2.99776857307117  |
| H                                           | 7.37750830728868  | -0.00132459698941 | 2.57620837874200  | H                                                            | 7.20262538006429  | -0.00046490647484 | 2.58165021726969  |
| H                                           | -0.56999540569725 | 0.00107073983738  | -2.64763566108282 | H                                                            | -0.58052503088187 | 0.00047267150653  | -2.88748567197221 |
| H                                           | 0.29391259588056  | -0.00006069240184 | 1.52984529406843  | H                                                            | 0.18489999079454  | -0.00008592117301 | 1.33598574661612  |
| O                                           | 2.56581611534504  | -0.00024107757330 | 2.50777608797369  | O                                                            | 2.38394730777850  | -0.00028918785383 | 2.40229263284654  |
| O                                           | 4.25983283731496  | 0.00022822450765  | -2.61432734996612 | O                                                            | 4.25027762818321  | 0.00028452258763  | -2.70384000083861 |
| <b>Coordinates from T<sub>2</sub> state</b> |                   |                   |                   | <b>Coordinates from the T<sub>1</sub>/S<sub>0</sub> MECP</b> |                   |                   |                   |
| C                                           | -2.41828432722647 | 3.58983493689270  | -0.79824450650328 | C                                                            | -2.20473136634032 | 3.56452833249018  | -0.37208990018192 |
| C                                           | -1.75240990375603 | 2.37849002545867  | -0.77975499443925 | C                                                            | -1.58174716596238 | 2.38540486905475  | -0.48657175171635 |
| C                                           | -2.36376882238267 | 1.23205712018199  | -0.27382952413339 | C                                                            | -2.34524072397084 | 1.18261692299228  | -0.33454403426823 |
| C                                           | -3.66532411762202 | 1.34563057807087  | 0.22623459029399  | C                                                            | -3.74499183412990 | 1.30444261690914  | -0.06813994108043 |
| C                                           | -4.33453966501280 | 2.55818789033982  | 0.17704236650825  | C                                                            | -4.37216497644063 | 2.58422599776549  | 0.05515709642213  |
| C                                           | -3.71633687821872 | 3.68690166258293  | -0.32766978065000 | C                                                            | -3.61121541713072 | 3.67537975991787  | -0.09396959844886 |
| C                                           | -3.66084343456395 | -1.34553527403916 | 0.23043651133295  | C                                                            | -3.74514898460383 | -1.30436960871835 | -0.06832378220607 |
| C                                           | -2.35994141399757 | -1.22865943549308 | -0.27044903082872 | C                                                            | -2.34538225716868 | -1.18267813838756 | -0.33472274837288 |
| C                                           | -1.74565704777868 | -2.37377668186691 | -0.77597270351156 | C                                                            | -1.58205814958881 | -2.38554336901240 | -0.48699997981743 |
| H                                           | -0.73819555581271 | -2.31892980627642 | -1.15666958773298 | H                                                            | -0.52786924080407 | -2.30170052270018 | -0.68416549114276 |
| C                                           | -2.40768353000814 | -3.58720573876419 | -0.79218012288795 | C                                                            | -2.20519828821542 | -3.56460370346196 | -0.37271955152680 |
| C                                           | -3.70490235340428 | -3.68775288350512 | -0.31995675009169 | C                                                            | -3.61169129496785 | -3.67532018172463 | -0.09458956133497 |
| C                                           | -4.32625277697383 | -2.56030456824355 | 0.18362224259399  | C                                                            | -4.37249312838991 | -2.58409244661533 | 0.05474088561466  |
| H                                           | -1.91399960216742 | 4.46118224239582  | -1.19346574457808 | H                                                            | -1.63134453477028 | 4.47276619120057  | -0.48677805791711 |
| H                                           | -0.74403782091563 | 2.32658457163280  | -1.15843576720746 | H                                                            | -0.52756387576034 | 2.30145567017911  | -0.68373062772325 |
| H                                           | -5.34643278046931 | 2.61255648853792  | 0.55713244668060  | H                                                            | -5.43073627571342 | 2.64098088459430  | 0.26496895715909  |
| H                                           | -4.24348158335834 | 4.63042752860745  | -0.34965950420752 | H                                                            | -4.04988418367463 | 4.65825103017608  | -0.00469404408399 |
| H                                           | -1.90125358567706 | -4.45735903411965 | -1.18731038348159 | H                                                            | -1.63193579887856 | -4.47289743442903 | -0.48758745654759 |
| H                                           | -4.22908989365488 | -4.63297131912325 | -0.34019225164581 | H                                                            | -4.05048916448448 | -4.65814930665668 | -0.00548658368895 |
| H                                           | -5.33778620595442 | -2.61723252604118 | 0.56420758060172  | H                                                            | -5.43107147137775 | -2.64074392607733 | 0.26454499793279  |
| N                                           | -1.68678140914430 | 0.00290501576084  | -0.24680489971069 | N                                                            | -1.74236725272828 | -0.00005689560685 | -0.44153506994453 |
| S                                           | -4.44160514962835 | -0.00001754021523 | 1.03941146931845  | S                                                            | -4.72125020874811 | 0.00008081378918  | 0.12435239691737  |
| C                                           | 7.08466394379758  | -0.00604589022166 | 0.43041279706145  | C                                                            | 6.97653949048969  | 0.00039593939712  | 0.38269049296939  |
| C                                           | 6.16844769097523  | -0.00356579724773 | -0.59399784239323 | C                                                            | 6.09899619453622  | 0.00026107116433  | -0.64078573064239 |
| C                                           | 4.79952210041197  | -0.00146482419012 | -0.32713299901224 | C                                                            | 4.67876919395209  | -0.00001500914573 | -0.42902486922423 |
| C                                           | 4.36126693268675  | -0.00292361013332 | 1.00161469025034  | C                                                            | 4.20097515057940  | -0.00014962084425 | 0.91673634073972  |
| C                                           | 5.30119458598408  | -0.00512736481491 | 2.04120124691472  | C                                                            | 5.17129874192473  | -0.00000442405894 | 1.97510032891856  |
| C                                           | 6.64448147309979  | -0.00681678766315 | 1.75430245730138  | C                                                            | 6.49742928828875  | 0.00024727840691  | 1.73019388208901  |
| C                                           | 3.85847924612611  | 0.00214077127954  | -1.45605270127597 | C                                                            | 3.81297459375638  | -0.00023497141261 | -1.55634459648084 |
| C                                           | 2.94299777925102  | -0.00241090051922 | 1.29532389217378  | C                                                            | 2.81858733540270  | -0.00041898906714 | 1.23421073462998  |
| C                                           | 1.99042026582002  | -0.0002604106161  | 0.21405869147959  | C                                                            | 1.99005327216433  | -0.00026259615526 | 0.13595221449603  |
| C                                           | 2.43159902164376  | 0.00271831263144  | -1.11679140534564 | C                                                            | 2.46108293707264  | -0.00013289859876 | -1.24452789404868 |
| C                                           | 1.49237358635508  | 0.00559451426638  | -2.14750349913207 | C                                                            | 1.47768578875757  | -0.00003551206522 | -2.30372092783489 |
| H                                           | 1.85640444679835  | 0.00737638278868  | -3.16515171589588 | H                                                            | 1.87725542657181  | -0.00002569831612 | -3.30901548259477 |
| C                                           | 0.14699862900608  | 0.00677279896573  | -1.87560204999293 | C                                                            | 0.14995217895509  | 0.00000008725017  | -2.08914339104440 |

|   |                   |                   |                   |   |                   |                   |                   |
|---|-------------------|-------------------|-------------------|---|-------------------|-------------------|-------------------|
| C | -0.28812219484839 | 0.00380985036523  | -0.54644016665205 | C | -0.24689868886761 | -0.00010193141798 | -0.70670295202189 |
| C | 0.61465574588257  | 0.00054782359412  | 0.48431723449282  | C | 0.55955246969534  | -0.00018123491016 | 0.34317955892921  |
| H | 8.14333327695376  | -0.00731864087363 | 0.21096080996409  | H | 8.04343570528136  | 0.00059874174312  | 0.19306761079947  |
| H | 6.47953855000644  | -0.00276250242252 | -1.62932813472101 | H | 6.42623847444501  | 0.00032591052249  | -1.67140602059647 |
| H | 4.95517754009577  | -0.00634153772173 | 3.06511367361320  | H | 4.77970274521264  | -0.00009286393564 | 2.98297866066236  |
| H | 7.36434596617953  | -0.00906973619566 | 2.56156448347802  | H | 7.20689631677441  | 0.00035130551589  | 2.54958390428210  |
| H | -0.58105029792108 | 0.00905069085593  | -2.67487320632701 | H | -0.57457280801496 | 0.00004416043686  | -2.89194537629481 |
| H | 0.26284325498299  | -0.00143706150698 | 1.50599319353245  | H | 0.23110930681235  | -0.00021804619047 | 1.37578714963799  |
| O | 2.53928045635349  | -0.00173442465783 | 2.49684087626940  | O | 2.34717752179017  | -0.00055830358330 | 2.48429033662395  |
| O | 4.24585685808669  | 0.00431872170888  | -2.61865898150314 | O | 4.25843595826909  | 0.00052804958595  | -2.80060712803831 |

**Coordinates from the  $T_2/T_1$  MECP**

|   |                   |                   |                   |
|---|-------------------|-------------------|-------------------|
| C | -2.22269505975029 | 3.64561890267326  | -0.10998776899961 |
| C | -1.61940732548972 | 2.42085400113088  | -0.15564647015196 |
| C | -2.36884955534251 | 1.23185288437784  | -0.22824922217927 |
| C | -3.80244167204461 | 1.34716385688986  | -0.25909648577194 |
| C | -4.39621491491827 | 2.62391749562878  | -0.23099954026236 |
| C | -3.63985273248332 | 3.75333514631244  | -0.15511421643310 |
| C | -3.80250448724045 | -1.34843410735546 | -0.28956875362625 |
| C | -2.36862311359674 | -1.23029554068327 | -0.24417037085142 |
| C | -1.61735134162609 | -2.41914627355546 | -0.17662262880028 |
| H | -0.54090715778522 | -2.36190475436194 | -0.13485044064108 |
| C | -2.21818445047425 | -3.64524491563504 | -0.15723673162406 |
| C | -3.63512399382725 | -3.75549146961306 | -0.22424716402106 |
| C | -4.39327044564219 | -2.62652277251882 | -0.28998784494010 |
| H | -1.61492634266749 | 4.53588013912172  | -0.03541017880227 |
| H | -0.54240544885850 | 2.36619806512824  | -0.13106681590401 |
| H | -5.47658471798895 | 2.69026522924263  | -0.26424157329808 |
| H | -4.11300420394439 | 4.72442623294487  | -0.12694947489742 |
| H | -1.60972870678654 | -4.53532193115243 | -0.08593720043202 |
| H | -4.10601785934481 | -4.72802503772584 | -0.21859276963266 |
| H | -5.47306512077318 | -2.69482666914204 | -0.33597522023622 |
| N | -1.74436821722276 | 0.00101818673823  | -0.30475707217457 |
| S | -4.83934999601985 | 0.00001943233180  | -0.36046762236840 |
| C | 7.06157838347400  | -0.00525034218292 | 0.27461112340908  |
| C | 6.12812745482054  | -0.02218384089311 | -0.74268811717792 |
| C | 4.77166610832914  | -0.00971756923728 | -0.44594829968954 |
| C | 4.35696501508341  | 0.02041735215443  | 0.88655988080026  |
| C | 5.30145590964679  | 0.03764672394275  | 1.90406867544551  |
| C | 6.64855468188543  | 0.02479606650070  | 1.60012359255576  |
| C | 3.79229423582208  | -0.02841482047900 | -1.56004220965155 |
| C | 2.91738748953812  | 0.03588594562648  | 1.23840403577920  |
| C | 1.93657752397711  | 0.01297102808996  | 0.11727530262366  |
| C | 2.35852305568263  | -0.01594833055949 | -1.21117671300536 |
| C | 1.40766913138738  | -0.03429785188877 | -2.23283526009219 |

|   |                   |                   |                   |
|---|-------------------|-------------------|-------------------|
| H | 1.74790540271447  | -0.05529963823461 | -3.25771552532466 |
| C | 0.06707289405231  | -0.02639858419475 | -1.93326510589182 |
| C | -0.34340471079821 | 0.00045607170167  | -0.60496856080059 |
| C | 0.58455821418763  | 0.01987809069608  | 0.41775793270210  |
| H | 8.11688522310251  | -0.01504973491811 | 0.03725889899408  |
| H | 6.43068160403338  | -0.04512809927971 | -1.77970445762926 |
| H | 4.96037617013890  | 0.06120236531410  | 2.92916846347408  |
| H | 7.38163111688724  | 0.03822675804930  | 2.39514848851188  |
| H | -0.67746836938567 | -0.04209970585661 | -2.71765377819110 |
| H | 0.26802106681265  | 0.03989238025324  | 1.45109751581132  |
| O | 2.54492330449211  | 0.06838508483674  | 2.39094204657200  |
| O | 4.15899695794351  | -0.05500745021833 | -2.71957936317680 |

**AQ-PTZ-O**

| Coordinates from $S_0$ state |                   |                   |                   | Coordinates from $S_1$ state |                   |                   |                   |
|------------------------------|-------------------|-------------------|-------------------|------------------------------|-------------------|-------------------|-------------------|
| C                            | -2.20374207115075 | 3.60104045520105  | -0.74189532564533 | C                            | -2.12540502045231 | 3.60736413345078  | -0.69382199120342 |
| C                            | -1.52956474749874 | 2.40097686250822  | -0.67354695867892 | C                            | -1.48248175963713 | 2.38895481968400  | -0.68963865042764 |
| C                            | -2.19948246762174 | 1.22283621430891  | -0.32380100432037 | C                            | -2.18429333398257 | 1.21643434609242  | -0.36141163318453 |
| C                            | -3.55614466147737 | 1.31805982559180  | -0.00266657754648 | C                            | -3.53840623896423 | 1.32457243693001  | 0.00131638136045  |
| C                            | -4.22519397953424 | 2.53314724535411  | -0.09223488093734 | C                            | -4.16549496810732 | 2.54956371508341  | -0.01602396172131 |
| C                            | -3.56292946247977 | 3.67912192550432  | -0.47060809952966 | C                            | -3.46886050097505 | 3.69789851768377  | -0.37265773228377 |
| C                            | -3.55625873342792 | -1.31820241138409 | -0.00220752462626 | C                            | -3.53812919161505 | -1.32473069149987 | 0.00228793264169  |
| C                            | -2.19958112935177 | -1.22321690206612 | -0.32334560943740 | C                            | -2.18405504164462 | -1.21656622669178 | -0.36057161498866 |
| C                            | -1.52976301843390 | -2.40154390823465 | -0.67265528649238 | C                            | -1.48203656830858 | -2.38916230482839 | -0.68808397987583 |
| H                            | -0.47597462016622 | -2.37890955369432 | -0.90020132142444 | H                            | -0.43985259195052 | -2.33088910241921 | -0.95312096291397 |
| C                            | -2.20405664084488 | -3.60156340803037 | -0.74062927458528 | C                            | -2.12469777767073 | -3.60770934586388 | -0.69135612834484 |
| C                            | -3.56326117081510 | -3.67942024684098 | -0.46936298777890 | C                            | -3.46810498873446 | -3.69830561226196 | -0.37000586392875 |
| C                            | -4.22542215850921 | -2.53325621223424 | -0.09138271338379 | C                            | -4.16496327561791 | -2.54986665983803 | -0.01415135197086 |
| H                            | -1.65593860538523 | 4.49165297948903  | -1.01965213841490 | H                            | -1.56782367264996 | 4.49504043090299  | -0.95619194255719 |
| H                            | -0.47578645896867 | 2.37815770910451  | -0.90112196076737 | H                            | -0.44025275146129 | 2.33072466936027  | -0.95450475539337 |
| H                            | -5.27614097635487 | 2.56503109500877  | 0.16669865228579  | H                            | -5.20608938451832 | 2.61281956810123  | 0.27476611496031  |
| H                            | -4.08675248349128 | 4.62206865160893  | -0.53432654809279 | H                            | -3.97302265536838 | 4.65347042683112  | -0.38347191804817 |
| H                            | -1.65633133280911 | -4.49232166211199 | -1.01807393105434 | H                            | -1.56695426485556 | -4.49544775721061 | -0.95316908213900 |
| H                            | -4.08717730581143 | -4.62233449116083 | -0.53279431382499 | H                            | -3.97206443695625 | -4.65399137677814 | -0.38010989995626 |
| H                            | -5.27637859052270 | -2.56495157282116 | 0.16753492061763  | H                            | -5.20553320107377 | -2.61313379355362 | 0.27672756005565  |
| N                            | -1.53241229813736 | -0.00021735782331 | -0.32221578703717 | N                            | -1.53788130576804 | -0.00002969643168 | -0.43914396594864 |
| S                            | -4.44738874555735 | 0.00009959350260  | 0.75767393514170  | S                            | -4.46592226212149 | 0.00008874143152  | 0.72819212362125  |
| C                            | 7.25850034019874  | 0.00056499492213  | 0.47481891662364  | C                            | 7.17521260870629  | -0.00000376775617 | 0.51501217914905  |
| C                            | 6.35283077696725  | -0.00011981327814 | -0.56787211144188 | C                            | 6.29665481479409  | -0.00006005860047 | -0.54041173082461 |
| C                            | 4.98973467774359  | -0.00012131052540 | -0.30601049444590 | C                            | 4.91513531798911  | 0.00005232066809  | -0.32186061513257 |
| C                            | 4.53643575799806  | 0.00064767669305  | 1.01340960597260  | C                            | 4.43008106118268  | 0.00021687070212  | 0.99483180972661  |
| C                            | 5.45243920037312  | 0.00129089546900  | 2.05615463906458  | C                            | 5.33845479676304  | 0.00028686901159  | 2.05927221050536  |
| C                            | 6.80762295043030  | 0.00125892150553  | 1.78788020754846  | C                            | 6.69162088867090  | 0.00017469369569  | 1.82624807625575  |
| C                            | 4.03900027691923  | -0.00105067328674 | -1.44415131024730 | C                            | 4.01429779789173  | 0.00003286109592  | -1.48324172101706 |
| C                            | 3.08595287659760  | 0.00100257910172  | 1.32789286507851  | C                            | 2.99223448885251  | 0.00024268639807  | 1.29216255606849  |

|   |                   |                   |                   |   |                   |                   |                   |
|---|-------------------|-------------------|-------------------|---|-------------------|-------------------|-------------------|
| C | 2.13251620255047  | 0.00010380319177  | 0.18613648978780  | C | 2.10957434885265  | 0.00016101164800  | 0.14401194481600  |
| C | 2.58537666345858  | -0.00060078864468 | -1.13047952862216 | C | 2.59706194294566  | -0.00001066724460 | -1.19101925922565 |
| C | 1.67100639703692  | -0.00104734353410 | -2.17589226850878 | C | 1.68321802620410  | -0.00018496347499 | -2.25235170221059 |
| H | 2.04012402513569  | -0.00156934008453 | -3.19123999211424 | H | 2.08580709628438  | -0.00031958990465 | -3.25637154530261 |
| C | 0.31876114659961  | -0.00088584796727 | -1.91047150047102 | C | 0.33152817827398  | -0.00018153098855 | -2.03744774027981 |
| C | -0.12840664231830 | -0.00032569563390 | -0.59547100402383 | C | -0.12439274231190 | 0.00000607433205  | -0.70262447544640 |
| C | 0.76929927143883  | 0.00015485146501  | 0.44998884260659  | C | 0.72940467767217  | 0.00017288200339  | 0.36133504331808  |
| H | 8.31995848791779  | 0.00054385908084  | 0.26703689698841  | H | 8.24168776462478  | -0.00009220739245 | 0.33237880870198  |
| H | 6.68397484062530  | -0.00070460432879 | -1.59647517975633 | H | 6.64655697997251  | -0.00018139155805 | -1.56305537485292 |
| H | 5.08332982839578  | 0.00188865511346  | 3.07177320825346  | H | 4.94156701132875  | 0.00040370775023  | 3.06450845847445  |
| H | 7.51807443104639  | 0.00180533062731  | 2.60341259436708  | H | 7.38416742482487  | 0.00021799099971  | 2.65763271238087  |
| H | -0.40357355523923 | -0.00124203599005 | -2.71578153746137 | H | -0.37535135718037 | -0.00033434332371 | -2.85509347641955 |
| H | 0.42132156373676  | 0.00066656411622  | 1.47335482441430  | H | 0.36059626691383  | 0.00028282186873  | 1.37828279590663  |
| O | 2.68657111054145  | 0.00108198396458  | 2.47090221345278  | O | 2.56614889761172  | 0.00064646937705  | 2.45775288746309  |
| O | 4.42735871079593  | -0.0011434725500  | -2.59180321598452 | O | 4.45134891529459  | -0.00045148260166 | -2.64365681736257 |
| O | -4.07964268060028 | 0.00033685449782  | 2.19945657445214  | O | -4.13740501372854 | 0.00064350512033  | 2.17360529755487  |

| Coordinates from S <sub>2</sub> state |                   |                   |                   | Coordinates from T <sub>1</sub> state |                   |                   |                   |
|---------------------------------------|-------------------|-------------------|-------------------|---------------------------------------|-------------------|-------------------|-------------------|
| C                                     | -2.16771974444425 | 3.60519530758636  | -0.71688140686372 | C                                     | -2.23608238972217 | 3.58592630425325  | -0.82022696181508 |
| C                                     | -1.50689296085164 | 2.39693042222942  | -0.67861571299320 | C                                     | -1.54941681021784 | 2.39227003488222  | -0.76130130510406 |
| C                                     | -2.19219102154330 | 1.21951893297204  | -0.34419106864070 | C                                     | -2.19069538896533 | 1.22097289037609  | -0.34400213036885 |
| C                                     | -3.54850286975175 | 1.32030755018442  | -0.00498004678108 | C                                     | -3.52657892362565 | 1.31554451491955  | 0.05402072806362  |
| C                                     | -4.19858046766088 | 2.54084402567928  | -0.05900024118743 | C                                     | -4.20924539705101 | 2.52339386024828  | -0.02385608292801 |
| C                                     | -3.52102681797766 | 3.68870829596044  | -0.42567137392203 | C                                     | -3.57753177281623 | 3.66269927212448  | -0.47011187542675 |
| C                                     | -3.54759481158080 | -1.32050362787405 | -0.00367639630775 | C                                     | -3.52645464215323 | -1.31547048706018 | 0.05490853569110  |
| C                                     | -2.19137891114962 | -1.21908834376830 | -0.34306685141109 | C                                     | -2.19058133712524 | -1.22104246240488 | -0.34316926106481 |
| C                                     | -1.50531573098916 | -2.39631879303063 | -0.67657041194385 | C                                     | -1.54915805895196 | -2.39255130592675 | -0.75962481759202 |
| H                                     | -0.45679865141725 | -2.35622099149451 | -0.92247997285713 | H                                     | -0.51121101860036 | -2.36689399351634 | -1.05144042323185 |
| C                                     | -2.16529075608669 | -3.60508309724852 | -0.71361453857548 | C                                     | -2.23566076969595 | -3.58634442783625 | -0.81763288503075 |
| C                                     | -3.51849326942528 | -3.68928050507724 | -0.42211975172104 | C                                     | -3.57708920481211 | -3.66303400035476 | -0.46741915635315 |
| C                                     | -4.19682099593861 | -2.54154509252791 | -0.05648064434748 | C                                     | -4.20895848088912 | -2.52346961912390 | -0.02204135319481 |
| H                                     | -1.61530346095337 | 4.49516018775835  | -0.98533598175507 | H                                     | -1.71331672763641 | 4.47216150993726  | -1.15457707397914 |
| H                                     | -0.45829425577509 | 2.35734949515064  | -0.92426224937792 | H                                     | -0.51147151411499 | 2.36654094664901  | -1.05308591748981 |
| H                                     | -5.24464701234839 | 2.58678151362752  | 0.21614907437007  | H                                     | -5.24269995901626 | 2.55619549682022  | 0.29758192759655  |
| H                                     | -4.03632801528549 | 4.63760820012921  | -0.46531585796030 | H                                     | -4.11050025105660 | 4.60101723640925  | -0.52641668045591 |
| H                                     | -1.61229235884048 | -4.49490243851684 | -0.98135128559470 | H                                     | -1.71277784908317 | -4.47276546995436 | -1.15130615577427 |
| H                                     | -4.03312823100315 | -4.63858129097113 | -0.46079808358380 | H                                     | -4.10992878813222 | -4.60146885273346 | -0.52298961683533 |
| H                                     | -5.24283510879466 | -2.58795095671487 | 0.21879051474901  | H                                     | -5.24240224458847 | -2.55616904651593 | 0.29944661827042  |
| N                                     | -1.53595622737607 | 0.00041643604647  | -0.38271632554523 | N                                     | -1.52049457735855 | -0.00001908615786 | -0.35183583807483 |
| S                                     | -4.44831644110654 | -0.00004166839889 | 0.74910529759985  | S                                     | -4.34768978117164 | 0.00028063705414  | 0.89340922493141  |
| C                                     | 7.21049205946569  | -0.00105140793441 | 0.49386434903793  | C                                     | 7.23524660172943  | 0.00058672960851  | 0.50806648364672  |
| C                                     | 6.32103362697925  | -0.00064521663510 | -0.55353151997223 | C                                     | 6.33782543041439  | 0.00033443583162  | -0.53325349295028 |
| C                                     | 4.94340445969650  | -0.00014694792024 | -0.31915044482571 | C                                     | 4.96475965308926  | -0.00009940336652 | -0.29090272390349 |
| C                                     | 4.47595844543925  | -0.00009795843815 | 0.99944065455964  | C                                     | 4.50141272070397  | -0.00017421212403 | 1.02828853728263  |
| C                                     | 5.39080856952924  | -0.00049426058852 | 2.06011964936217  | C                                     | 5.42157099910003  | 0.00007910031121  | 2.08623492889135  |

|   |                   |                   |                   |   |                   |                   |                   |
|---|-------------------|-------------------|-------------------|---|-------------------|-------------------|-------------------|
| C | 6.74072813332860  | -0.00097417583753 | 1.80917189675227  | C | 6.77007734094876  | 0.00047361466945  | 1.82274565853523  |
| C | 4.02960863515039  | 0.00026344905605  | -1.46957358271987 | C | 4.04554925945019  | -0.00040624343213 | -1.43589366945812 |
| C | 3.04707533881271  | 0.00030040156845  | 1.28585979756154  | C | 3.07860078731782  | -0.00043051018021 | 1.29337374976279  |
| C | 2.13575410478044  | 0.00050987683806  | 0.16733738661068  | C | 2.13988674256087  | -0.00031588213300 | 0.19437346563346  |
| C | 2.60268180692335  | 0.00047319759810  | -1.16177623036323 | C | 2.60974650206894  | -0.00033062811497 | -1.12247276155505 |
| C | 1.67957342262223  | 0.00054408041051  | -2.21017084936149 | C | 1.69595348316121  | -0.00022510744694 | -2.17589975028643 |
| H | 2.05769687199781  | 0.00047434671758  | -3.22265313986278 | H | 2.08726149084450  | -0.00025961409920 | -3.18360023660419 |
| C | 0.32918083014023  | 0.00064172166424  | -1.96348447050760 | C | 0.34515579281079  | -0.00017561118492 | -1.93611526088729 |
| C | -0.12111802719244 | 0.00068068691111  | -0.63632050335513 | C | -0.11608596265863 | -0.00008846441462 | -0.61940350620290 |
| C | 0.75661665675927  | 0.00064669903851  | 0.41176828953229  | C | 0.75822741708114  | -0.00020422827444 | 0.43682735529322  |
| H | 8.27455711273404  | -0.00143330871022 | 0.29953276185053  | H | 8.29773507044344  | 0.00089141446142  | 0.30803379030583  |
| H | 6.65919152150687  | -0.00068887379282 | -1.58042687780145 | H | 6.66805444815251  | 0.00042401182963  | -1.56278700796143 |
| H | 5.00902497647540  | -0.00045057725058 | 3.07152629623179  | H | 5.06053929024303  | 0.00005901464883  | 3.10506907624402  |
| H | 7.44143124490581  | -0.00130593612897 | 2.63344515847548  | H | 7.47436798234098  | 0.00073392245876  | 2.64365369698288  |
| H | -0.38717302345543 | 0.00061933739899  | -2.77345920105411 | H | -0.36633650310775 | -0.00014594142084 | -2.75016587870583 |
| H | 0.39822457709930  | 0.00061610622786  | 1.43209826936597  | H | 0.37630354433464  | -0.00020320233268 | 1.44810258876500  |
| O | 2.62291742354552  | 0.00031572012243  | 2.46556152433205  | O | 2.65519654842921  | -0.00042445796440 | 2.48892348452745  |
| O | 4.44932697294616  | -0.00005962518825 | -2.62902105294288 | O | 4.44906833010161  | 0.00018767870668  | -2.59089785107866 |
| O | -4.08040261989011 | 0.00077910317167  | 2.18868015374421  | O | -3.84728608277586 | 0.00075963187376  | 2.29512482388942  |

| Coordinates from T <sub>2</sub> state |                   |                   |                   | Coordinates from the T <sub>1</sub> /S <sub>0</sub> MECP |                   |                   |                   |
|---------------------------------------|-------------------|-------------------|-------------------|----------------------------------------------------------|-------------------|-------------------|-------------------|
| C                                     | -2.22520923682948 | 3.59323853027772  | -0.78905976349452 | C                                                        | 0.79370247704893  | 3.56040080769621  | 0.35439667320137  |
| C                                     | -1.54359007353396 | 2.39676592513159  | -0.73371389160873 | C                                                        | 0.24604376553565  | 2.54563504575484  | 1.09902599724878  |
| C                                     | -2.19452136063061 | 1.22137335074392  | -0.34238900163332 | C                                                        | -0.54125943951248 | 1.54183401458587  | 0.49883827874998  |
| C                                     | -3.53657115062768 | 1.31613459486957  | 0.03499791141012  | C                                                        | -0.75698023399967 | 1.62019391928643  | -0.89356573224099 |
| C                                     | -4.21420059200583 | 2.52738364109471  | -0.04053289030422 | C                                                        | -0.18893819414119 | 2.63848524248456  | -1.63520886176920 |
| C                                     | -3.57251694126928 | 3.67014227263166  | -0.46192952709890 | C                                                        | 0.58385733060596  | 3.60896202025769  | -1.02056521629054 |
| C                                     | -3.53631269964102 | -1.31625639901057 | 0.03590859476020  | C                                                        | -2.16557267033417 | -0.62240334568355 | -0.49236553232347 |
| C                                     | -2.19428445019319 | -1.22148991984740 | -0.34155904421073 | C                                                        | -1.75159000782814 | -0.44921485829426 | 0.84638051512779  |
| C                                     | -1.54311427160449 | -2.39703941035250 | -0.73202493211467 | C                                                        | -2.13644384312317 | -1.42835737428646 | 1.78509983646419  |
| H                                     | -0.49983211380319 | -2.37251503384957 | -1.00383852748248 | H                                                        | -1.80339025811300 | -1.29265629168845 | 2.80451406528708  |
| C                                     | -2.22448475527575 | -3.59369486441547 | -0.78647501654547 | C                                                        | -2.89358095742193 | -2.51239052409897 | 1.41369773917177  |
| C                                     | -3.57177111779944 | -3.67063881323406 | -0.45927198763428 | C                                                        | -3.29585826882879 | -2.66141874012491 | 0.09005857870179  |
| C                                     | -4.21368921204445 | -2.52770175055402 | -0.03872193379249 | C                                                        | -2.92563275782308 | -1.71698629549024 | -0.85368520283939 |
| H                                     | -1.69339767759788 | 4.48213830281190  | -1.10130975469968 | H                                                        | 1.39901328423243  | 4.31594773848526  | 0.83586654048604  |
| H                                     | -0.50030044318083 | 2.37225026365272  | -1.00551353120802 | H                                                        | 0.40763972528813  | 2.47472678409308  | 2.16534481720278  |
| H                                     | -5.25288752430293 | 2.55910172630715  | 0.26383052768871  | H                                                        | -0.35900410812429 | 2.67798051111437  | -2.70351198798540 |
| H                                     | -4.10188603944103 | 4.61062079645680  | -0.51577116553877 | H                                                        | 1.02375767156828  | 4.39938641751104  | -1.61260008557382 |
| H                                     | -1.69248945976921 | -4.48271682661587 | -1.09806246112083 | H                                                        | -3.17435729777945 | -3.25237568116339 | 2.15068285996068  |
| H                                     | -4.10094244123066 | -4.61126964232348 | -0.51239560092645 | H                                                        | -3.89119104813503 | -3.51340596599555 | -0.20737985731675 |
| H                                     | -5.25236521562890 | -2.55941238194556 | 0.26568320351124  | H                                                        | -3.23619184389670 | -1.83215798455867 | -1.88439468043897 |
| N                                     | -1.52576160402516 | 0.00000545480907  | -0.35544501785972 | N                                                        | -1.00871866554120 | 0.57491844070735  | 1.31947958324194  |
| S                                     | -4.37909638581440 | 0.00013713741173  | 0.85082191226239  | S                                                        | -1.80559926792254 | 0.51600159357209  | -1.80654290849730 |
| C                                     | 7.24149528805683  | -0.00001970115376 | 0.50554551799261  | C                                                        | 4.19249290482108  | 2.25255346035785  | 0.35316567430346  |
| C                                     | 6.35305460615874  | -0.00000677980376 | -0.54459672129448 | C                                                        | 3.57979260655376  | 1.63736568802977  | -0.72102261492451 |

|   |                   |                   |                   |   |                   |                   |                   |
|---|-------------------|-------------------|-------------------|---|-------------------|-------------------|-------------------|
| C | 4.97602259523668  | 0.00010533702025  | -0.30547875552379 | C | 2.82594876312239  | 0.48905464499330  | -0.52901652473547 |
| C | 4.50503942509634  | 0.00018591505064  | 1.02596798421006  | C | 2.68746207097321  | -0.04151476564181 | 0.75355373037542  |
| C | 5.42593547590713  | 0.00018382685015  | 2.07665950949412  | C | 3.29838148904950  | 0.58577476856406  | 1.82948442613389  |
| C | 6.77726338137117  | 0.00007601791028  | 1.81867850630164  | C | 4.04942176138836  | 1.72793728234986  | 1.62984823849858  |
| C | 4.03441005241299  | 0.00016443981385  | -1.40822847837520 | C | 2.17173171153231  | -0.14577180261059 | -1.70077225686649 |
| C | 3.07817977486498  | 0.00020925479877  | 1.29478793632684  | C | 1.89116182959967  | -1.26989428791833 | 0.99396262865885  |
| C | 2.13852095801131  | 0.00018512817176  | 0.18828680906040  | C | 1.25492234578818  | -1.91745378358323 | -0.18324737900602 |
| C | 2.60902760944265  | 0.00007382641684  | -1.14270264066144 | C | 1.38177885011214  | -1.38014170174031 | -1.46564840476643 |
| C | 1.68728619125579  | -0.00008032859809 | -2.19492806979870 | C | 0.76624407191123  | -1.99560550873332 | -2.55007039513757 |
| H | 2.04773617449191  | -0.00017091304009 | -3.21257742097165 | H | 0.87567422199188  | -1.55383551779347 | -3.53042624828049 |
| C | 0.33857704493101  | -0.00010750575820 | -1.93893389617707 | C | 0.02243224237703  | -3.15163749575793 | -2.36853767844236 |
| C | -0.12085091920979 | 0.00004755188131  | -0.62336789735014 | C | -0.06244086429361 | -3.63044689754388 | -1.08844870463470 |
| C | 0.76174238945343  | 0.00021117174512  | 0.42776058155602  | C | 0.51021309651146  | -3.07904514507272 | 0.01586266309807  |
| H | 8.30473795502342  | -0.00010454381523 | 0.30873143345710  | H | 4.77965006443293  | 3.14781318908992  | 0.19880280068753  |
| H | 6.71034104025157  | -0.00006807784460 | -1.56363440997158 | H | 3.67066091200629  | 2.03571695108334  | -1.72118601442960 |
| H | 5.06201182897140  | 0.00023560458978  | 3.09339559345570  | H | 3.17339238874396  | 0.16299533440966  | 2.81603162198740  |
| H | 7.48056795805375  | 0.00005494095201  | 2.63994168417694  | H | 4.52578781214240  | 2.21354570079932  | 2.47085031128800  |
| H | -0.37621577137662 | -0.00023493682008 | -2.75041925669928 | H | -0.46476893509547 | -3.63660187241491 | -3.20369376332400 |
| H | 0.38760539661350  | 0.00029883687642  | 1.44106552421971  | H | 0.41013769267749  | -3.48478706525582 | 1.01270443448646  |
| O | 2.65814236564379  | 0.00049727877102  | 2.47170553685356  | O | 1.76337355263149  | -1.73540490127636 | 2.10496264039461  |
| O | 4.44917283127995  | -0.00012203884752 | -2.59084606810212 | O | 2.27723025709457  | 0.32891785490809  | -2.81156546519130 |
| O | -3.91769388569260 | 0.00064874078311  | 2.26571389546135  | O | -3.05750123782700 | 1.24618039659325  | -2.14340413974168 |

| Coordinates from the $S_1/T_1/T_2$ MECP |                   |                   |                   | Coordinates from the $T_2/T_1$ MECP |                   |                   |                   |
|-----------------------------------------|-------------------|-------------------|-------------------|-------------------------------------|-------------------|-------------------|-------------------|
| C                                       | -2.41330778463294 | 3.52300573353979  | -1.02482034457834 | C                                   | -2.21889325481205 | 3.59118129937919  | -0.78067088931501 |
| C                                       | -1.67044133545189 | 2.36126523834851  | -0.95618437890057 | C                                   | -1.53671016003238 | 2.39497026735308  | -0.72403245232759 |
| C                                       | -2.19544958036165 | 1.21395115729229  | -0.36568925159437 | C                                   | -2.18749230021730 | 1.21999859224588  | -0.33137117255406 |
| C                                       | -3.47093209645134 | 1.30531163407113  | 0.18351302733460  | C                                   | -3.53000027934380 | 1.31445173128417  | 0.04480726284629  |
| C                                       | -4.22637994740734 | 2.47524207872534  | 0.08358915557171  | C                                   | -4.20791039365864 | 2.52527720143943  | -0.03158980340882 |
| C                                       | -3.70854831999656 | 3.58920793617013  | -0.52552710083089 | C                                   | -3.56612915484006 | 3.66795928261993  | -0.45343320865103 |
| C                                       | -3.47535163187847 | -1.30326943355955 | 0.18381988470179  | C                                   | -3.53203809544931 | -1.31685633048780 | 0.03220556494009  |
| C                                       | -2.19959055270860 | -1.21634473891382 | -0.36547920294531 | C                                   | -2.18873489773542 | -1.22191466992435 | -0.34128457548870 |
| C                                       | -1.67864101451022 | -2.36543891667674 | -0.95608502618832 | C                                   | -1.53908102404467 | -2.39578201046825 | -0.73936277649271 |
| H                                       | -0.68268535441909 | -2.36270673946306 | -1.37151192255977 | H                                   | -0.49499016670293 | -2.37176205752383 | -1.00795161338944 |
| C                                       | -2.42547613644229 | -3.52464706446530 | -1.02450530030359 | C                                   | -2.22356857116515 | -3.59004159789967 | -0.80675911380240 |
| C                                       | -3.72083479283556 | -3.58641347742866 | -0.52493141376699 | C                                   | -3.57204420022733 | -3.66634858152568 | -0.48444911452581 |
| C                                       | -4.23478362905094 | -2.47063271819495 | 0.08413517454301  | C                                   | -4.21224348735889 | -2.52569984031606 | -0.05507805605115 |
| H                                       | -1.97383385228753 | 4.39338368555031  | -1.49516698575020 | H                                   | -1.68772781527975 | 4.47984969413305  | -1.09466001808231 |
| H                                       | -0.67437986496253 | 2.35521902241819  | -1.37126750523232 | H                                   | -0.49374782555737 | 2.36991167874413  | -0.99717292560530 |
| H                                       | -5.21752729798181 | 2.48974696803389  | 0.51978695538889  | H                                   | -5.24691367174810 | 2.55677433465068  | 0.27172240111108  |
| H                                       | -4.28426375395375 | 4.50078462205401  | -0.59757270006989 | H                                   | -4.09582159540030 | 4.60820703628969  | -0.50839991975569 |
| H                                       | -1.98909414834435 | -4.39654469249693 | -1.49491282717618 | H                                   | -1.69314505268105 | -4.47758545132324 | -1.12514519075111 |
| H                                       | -4.29966124913968 | -4.49603490607250 | -0.59676966868939 | H                                   | -4.10355502889653 | -4.60503837973613 | -0.54791716846271 |
| H                                       | -5.22592011636159 | -2.48170404176743 | 0.52046162982515  | H                                   | -5.25185038251041 | -2.55748595261775 | 0.24614013530110  |
| N                                       | -1.49460268141643 | -0.00238114678079 | -0.31334258611528 | N                                   | -1.51870354407648 | -0.00106537019319 | -0.34394073588996 |

|   |                   |                   |                   |   |                   |                   |                   |
|---|-------------------|-------------------|-------------------|---|-------------------|-------------------|-------------------|
| S | -4.09170985385263 | 0.00218473704257  | 1.18810216165080  | S | -4.37374082489200 | -0.00434097538575 | 0.85468603089598  |
| C | 7.30674135276489  | 0.01534399432815  | 0.58939891669534  | C | 7.22296688565875  | -0.00526731533813 | 0.49342364754021  |
| C | 6.41046856773095  | 0.01009029171077  | -0.46662921097919 | C | 6.33803966195724  | -0.01910352509867 | -0.56016793216440 |
| C | 5.04830335571440  | 0.00095466341092  | -0.22942176568752 | C | 4.96936816646767  | -0.00868036255176 | -0.33316976311402 |
| C | 4.58548873010673  | -0.00219015501244 | 1.08530614631355  | C | 4.47912511119757  | 0.00862812711192  | 1.03850206483324  |
| C | 5.47840466006725  | 0.00176410364235  | 2.15063274395259  | C | 5.41851946036338  | 0.02429771331677  | 2.10798586824099  |
| C | 6.83807161328977  | 0.01122941623822  | 1.89295898255141  | C | 6.74748370230515  | 0.01663740643229  | 1.84639363000599  |
| C | 4.11010456717728  | -0.00535292167160 | -1.38283958119406 | C | 4.04568871184060  | -0.01203484147881 | -1.45587976679080 |
| C | 3.14250841854945  | -0.00904181531430 | 1.31760457809471  | C | 3.07727612200992  | 0.00970385231982  | 1.31288387198965  |
| C | 2.14687204768307  | -0.00698671587692 | 0.19953547846938  | C | 2.14678189510879  | 0.00219425340242  | 0.18191694886152  |
| C | 2.63474677542139  | -0.00638129829972 | -1.09155541753250 | C | 2.60806183745360  | -0.00502958065805 | -1.13781395226215 |
| C | 1.74076591200403  | -0.00483182955036 | -2.14737124143396 | C | 1.68854202473624  | -0.00736564947381 | -2.18825982875837 |
| H | 2.13218126373167  | -0.00376374224514 | -3.15446749624762 | H | 2.06701652103317  | -0.01064707305697 | -3.20019600829121 |
| C | 0.37840601471189  | -0.00441881555200 | -1.90401463971452 | C | 0.34000768549411  | -0.00417299668516 | -1.93489536908288 |
| C | -0.10577794951909 | -0.00446019228161 | -0.61003424554605 | C | -0.11386639690898 | -0.00068490042876 | -0.61609014688691 |
| C | 0.78955807757478  | -0.00616586984283 | 0.45402460504569  | C | 0.77230271186983  | 0.00374014793629  | 0.43138619146408  |
| H | 8.36970133884722  | 0.02247843405750  | 0.39445534034498  | H | 8.28801353148382  | -0.00768905296564 | 0.30682783295597  |
| H | 6.75269037137540  | 0.01273639947797  | -1.49191503641266 | H | 6.68516877914214  | -0.03341842646564 | -1.58358861999422 |
| H | 5.11553482307636  | -0.00097619844805 | 3.16838157397269  | H | 5.03792177322551  | 0.04061663028853  | 3.11847591678471  |
| H | 7.53412850912987  | 0.01525446978562  | 2.72028647567980  | H | 7.46406404758058  | 0.02603570207228  | 2.65600794172254  |
| H | -0.31987264329525 | -0.00370471101905 | -2.72963109772399 | H | -0.37778147569573 | -0.00392516072304 | -2.74385000548962 |
| H | 0.39645612417571  | -0.00592447434814 | 1.46027745959356  | H | 0.41230339731755  | 0.00850265684226  | 1.45028420742119  |
| O | 2.70450253176366  | -0.02256041820514 | 2.47417899825729  | O | 2.66342112713684  | 0.02095924845933  | 2.49719540881321  |
| O | 4.50825728041948  | -0.00845870630738 | -2.51886096851776 | O | 4.45057027540458  | -0.02749829875503 | -2.61769517449182 |
| O | -3.30194174805373 | 0.00100115389680  | 2.45581262770431  | O | -3.91306882955248 | -0.01163845523991 | 2.26973537615239  |

**AQ-PTZ-O<sub>2</sub>**

| <b>Coordinates from S<sub>0</sub> state</b> |                   |                   |                   | <b>Coordinates from S<sub>1</sub> state</b> |                   |                   |                   |
|---------------------------------------------|-------------------|-------------------|-------------------|---------------------------------------------|-------------------|-------------------|-------------------|
| C                                           | -2.22798230126872 | 3.59941912101636  | -0.76443705503928 | C                                           | -2.21946818660530 | 3.59669488478793  | -0.79178656128822 |
| C                                           | -1.55140132891170 | 2.40011832424920  | -0.70539162968844 | C                                           | -1.54665894871908 | 2.39442838279046  | -0.76186979749026 |
| C                                           | -2.20688007890842 | 1.22851989298799  | -0.31223082181894 | C                                           | -2.19332463595693 | 1.22698641463317  | -0.33982396066950 |
| C                                           | -3.55008041555183 | 1.34208903889537  | 0.05389598638768  | C                                           | -3.52083252442553 | 1.34330410139933  | 0.08438706401086  |
| C                                           | -4.23269653542707 | 2.54762586160008  | -0.03237007053698 | C                                           | -4.19750393916163 | 2.55080743310152  | 0.03170287784159  |
| C                                           | -3.57708882084781 | 3.68411731812434  | -0.44713857119948 | C                                           | -3.55172035903197 | 3.68516839039721  | -0.41258261596719 |
| C                                           | -3.54998699840500 | -1.34225436626617 | 0.05448152802708  | C                                           | -3.52069897759173 | -1.34337024797851 | 0.08506857805624  |
| C                                           | -2.20679078824269 | -1.22875794408248 | -0.31168485755374 | C                                           | -2.19319393860806 | -1.22713616106814 | -0.33916529731567 |
| C                                           | -1.55122867624984 | -2.40049012338563 | -0.70430817093614 | C                                           | -1.54641056523807 | -2.39471862143808 | -0.76064274186588 |
| H                                           | -0.50772343395380 | -2.37249065182266 | -0.97356279111360 | H                                           | -0.51658797928466 | -2.35583367738395 | -1.07664207347832 |
| C                                           | -2.22772735042925 | -3.59986077126496 | -0.76283769389692 | C                                           | -2.21909270411158 | -3.59707046645408 | -0.78994567152623 |
| C                                           | -3.57683150430640 | -3.68451093459075 | -0.44551790737059 | C                                           | -3.55133492734052 | -3.68549038749397 | -0.41069313184562 |
| C                                           | -4.23251804114013 | -2.54788017277267 | -0.03125208998777 | C                                           | -4.19724476541217 | -2.55096921318370 | 0.03299688086251  |
| H                                           | -1.69064987229294 | 4.48496029242302  | -1.07630717852851 | H                                           | -1.69395104294239 | 4.47998917785165  | -1.12827468532999 |
| H                                           | -0.50789896256248 | 2.37206126781482  | -0.97465898073448 | H                                           | -0.51682117731156 | 2.35550285062913  | -1.07781039044191 |
| H                                           | -5.27684551564650 | 2.57395127485500  | 0.24770540091427  | H                                           | -5.22784471219875 | 2.58573662286775  | 0.35803596012143  |
| H                                           | -4.10145477039459 | 4.62668988523049  | -0.50975570686656 | H                                           | -4.07420005710794 | 4.63009351542532  | -0.45118518962501 |



|                                             |                   |                   |                   |                                             |                   |                   |                   |
|---------------------------------------------|-------------------|-------------------|-------------------|---------------------------------------------|-------------------|-------------------|-------------------|
| H                                           | -1.69032980310252 | -4.48550163681418 | -1.07431179726471 | H                                           | -1.69348851400092 | -4.48047860329361 | -1.12599954304423 |
| H                                           | -4.10113406812620 | -4.62714543702904 | -0.50772921113031 | H                                           | -4.07371926613619 | -4.63048762173263 | -0.44882123698509 |
| H                                           | -5.27666736786022 | -2.57415226059280 | 0.24882910521259  | H                                           | -5.22758440185612 | -2.58583213787295 | 0.35933335032549  |
| N                                           | -1.54252536464871 | -0.00009449257618 | -0.30956469450725 | N                                           | -1.53307724198335 | -0.00005060764263 | -0.37603472266174 |
| C                                           | 7.24739748341068  | 0.00009749417813  | 0.48165196028617  | C                                           | 7.19544627012999  | 0.00032507272330  | 0.52043465180989  |
| C                                           | 6.34185607865424  | -0.00027214218769 | -0.56114727721770 | C                                           | 6.31240975760056  | -0.00011655063473 | -0.53076039824614 |
| C                                           | 4.97876187614087  | -0.00001874902168 | -0.29942314537123 | C                                           | 4.93249781892595  | -0.00016555667823 | -0.29742740316523 |
| C                                           | 4.52554480765852  | 0.00065551283315  | 1.02013392242898  | C                                           | 4.45842167071739  | 0.00025677162043  | 1.01502175260350  |
| C                                           | 5.44141535312042  | 0.00101113744302  | 2.06296592860584  | C                                           | 5.36945066850067  | 0.00072553425269  | 2.07899063914657  |
| C                                           | 6.79654744847652  | 0.00073071024413  | 1.79471581468924  | C                                           | 6.72014252203549  | 0.00076465756118  | 1.83423713409163  |
| C                                           | 4.02829170802063  | -0.00059568840685 | -1.43769991020527 | C                                           | 4.02153532214501  | -0.00055108096932 | -1.44317930981011 |
| C                                           | 3.07547443896965  | 0.00104469587050  | 1.33451168671014  | C                                           | 3.02626676737456  | 0.00007860727865  | 1.31445937773141  |
| C                                           | 2.12213650578772  | 0.00032931824294  | 0.19244957020462  | C                                           | 2.11989010350704  | -0.00001348670000 | 0.17191741054471  |
| C                                           | 2.57423119782047  | -0.00028411886312 | -1.12411352523975 | C                                           | 2.59671834641706  | -0.00042197141837 | -1.14303107108199 |
| C                                           | 1.65953666621384  | -0.00072181778709 | -2.16933874954318 | C                                           | 1.68363912313014  | -0.00061149635520 | -2.20689785734588 |
| H                                           | 2.02850169193794  | -0.00117680569914 | -3.18474654391867 | H                                           | 2.08117883755721  | -0.00090465528670 | -3.21306775422907 |
| C                                           | 0.3072776051448   | -0.00061670734546 | -1.90364513263231 | C                                           | 0.33552739798943  | -0.00046190757215 | -1.97387932932833 |
| C                                           | -0.13864226266230 | -0.00011065995943 | -0.58817712714952 | C                                           | -0.12997135487608 | -0.00008409760335 | -0.65065283835370 |
| C                                           | 0.75920835296477  | 0.00037055345972  | 0.45676623686154  | C                                           | 0.73924550274266  | 0.00014472313052  | 0.40606158832681  |
| H                                           | 8.30885615900680  | -0.00012497557262 | 0.27397574005244  | H                                           | 8.26012495067504  | 0.00034260931957  | 0.32955947932615  |
| H                                           | 6.67299147795628  | -0.00079726273765 | -1.58975199947745 | H                                           | 6.65584868118817  | -0.00042681193230 | -1.55598759045164 |
| H                                           | 5.07207984015629  | 0.00152224237336  | 3.07851208997003  | H                                           | 4.97993246644022  | 0.00102934801407  | 3.08751134460502  |
| H                                           | 7.50699547508990  | 0.00101054348325  | 2.61023304584479  | H                                           | 7.41640625275785  | 0.00112272640639  | 2.66207280862659  |
| H                                           | -0.41529197364097 | -0.00096690283389 | -2.70881003661761 | H                                           | -0.37280584566804 | -0.00067458532985 | -2.79103998997406 |
| H                                           | 0.41234543555263  | 0.00081153573985  | 1.48049285599228  | H                                           | 0.37270959883797  | 0.00040092023447  | 1.42359030544603  |
| O                                           | 2.67497494474663  | 0.00122828155504  | 2.47711482039331  | O                                           | 2.60637344574380  | 0.00137563145765  | 2.48092121585319  |
| O                                           | 4.41598144391415  | -0.00107563958326 | -2.58539497624289 | O                                           | 4.43944571948857  | -0.00115701126373 | -2.60858396585569 |
| O                                           | -3.99689308155276 | 0.00037800810091  | 2.21261506406807  | O                                           | -3.89163619389032 | 0.00047085887037  | 2.25524789057730  |
| S                                           | -4.35342899720210 | 0.00005723008310  | 0.81752548227261  | S                                           | -4.29953043224472 | 0.00012451781655  | 0.87540554123670  |
| O                                           | -5.75201008277847 | -0.00006870960842 | 0.48409475286760  | O                                           | -5.70681078220115 | -0.00001172528318 | 0.58619261623311  |
| <b>Coordinates from S<sub>2</sub> state</b> |                   |                   |                   | <b>Coordinates from T<sub>1</sub> state</b> |                   |                   |                   |
| C                                           | -2.15596516175630 | 3.61176123030890  | -0.67973389402616 | C                                           | -2.26244946378411 | 3.58121273529292  | -0.85036461252570 |
| C                                           | -1.50675723461696 | 2.39754729643311  | -0.65715381315851 | C                                           | -1.57291727631539 | 2.38908882975563  | -0.79171668660654 |
| C                                           | -2.19900981461491 | 1.22426962748047  | -0.31822665160741 | C                                           | -2.19973349948521 | 1.22626371075201  | -0.33372231241706 |
| C                                           | -3.55164544323912 | 1.34736992778913  | 0.03379332658117  | C                                           | -3.52358464155254 | 1.33944223060167  | 0.09679721705302  |
| C                                           | -4.19774727911216 | 2.56640265362673  | -0.00700845202180 | C                                           | -4.22031477434112 | 2.53662008887777  | 0.01282701217207  |
| C                                           | -3.50490640665626 | 3.70698383996293  | -0.37232324066453 | C                                           | -3.59460542665401 | 3.66498643663691  | -0.46668866851329 |
| C                                           | -3.55099375275056 | -1.34745644288093 | 0.03537199005421  | C                                           | -3.52355963537566 | -1.33947898440295 | 0.09749904915988  |
| C                                           | -2.19845091866454 | -1.22409029270636 | -0.31693083481836 | C                                           | -2.19969685697543 | -1.22650243828248 | -0.33303686103652 |
| C                                           | -1.50567204230746 | -2.39741252967961 | -0.65465252794837 | C                                           | -1.57283039138769 | -2.38954854214137 | -0.79038712339071 |
| H                                           | -0.46196861946018 | -2.34557763433706 | -0.91607432984246 | H                                           | -0.54485599594230 | -2.35774994540140 | -1.11418585213845 |
| C                                           | -2.15426750088989 | -3.61197679722549 | -0.67573063588231 | C                                           | -2.26231431543561 | -3.58173365207896 | -0.84837379922241 |
| C                                           | -3.50311427004502 | -3.70751973223020 | -0.36801410242193 | C                                           | -3.59446971916102 | -3.66534673745006 | -0.46466326672331 |
| C                                           | -4.19648612150440 | -2.56685937198832 | -0.00395845838125 | C                                           | -4.22023953366152 | -2.53673122870263 | 0.01419647184749  |

|                                             |                   |                   |                   |                                                              |                   |                   |                   |
|---------------------------------------------|-------------------|-------------------|-------------------|--------------------------------------------------------------|-------------------|-------------------|-------------------|
| H                                           | -1.59877580148214 | 4.49744197982282  | -0.95128411543409 | H                                                            | -1.75040629888109 | 4.46102478971169  | -1.21638977501054 |
| H                                           | -0.46297779471830 | 2.34593042013026  | -0.91833062461950 | H                                                            | -0.54494363935840 | 2.35716655212489  | -1.11549100983442 |
| H                                           | -5.24367856717841 | 2.61533653393852  | 0.26306394397196  | H                                                            | -5.24902905782610 | 2.56389042634914  | 0.34484588806972  |
| H                                           | -4.01100339270187 | 4.66095881440849  | -0.40407248137191 | H                                                            | -4.12896875650808 | 4.60193192516716  | -0.52968462578882 |
| H                                           | -1.59667528922750 | -4.49768876205551 | -0.94634989746494 | H                                                            | -1.75023002510241 | -4.46173039028617 | -1.21389699897020 |
| H                                           | -4.00873434594113 | -4.66178540010168 | -0.39858576236335 | H                                                            | -4.12879512983354 | -4.60234781867084 | -0.52714358001456 |
| H                                           | -5.24236863225970 | -2.61600603598914 | 0.26627004055494  | H                                                            | -5.24895672845784 | -2.56385426845611 | 0.34621518864767  |
| N                                           | -1.55222118169235 | 0.00021358405006  | -0.37134126753679 | N                                                            | -1.53105438099626 | -0.00012114991747 | -0.33252898834054 |
| C                                           | 7.19375680352430  | -0.00046433396536 | 0.47531215553885  | C                                                            | 7.22661796354646  | 0.00051119741830  | 0.51373303649032  |
| C                                           | 6.30191712576450  | 0.00015313760693  | -0.56885817225108 | C                                                            | 6.32817940236596  | 0.00012615100079  | -0.52658383287331 |
| C                                           | 4.92353124369832  | 0.00023278177321  | -0.32448122410394 | C                                                            | 4.95534322134312  | 0.00000327050288  | -0.28281813521629 |
| C                                           | 4.45890168444462  | -0.00031268712632 | 0.99565460490494  | C                                                            | 4.49361243300496  | 0.00031035825227  | 1.03685119687144  |
| C                                           | 5.38076154081953  | -0.00096086823925 | 2.04685448146973  | C                                                            | 5.41473581430716  | 0.00067914855617  | 2.09393734269193  |
| C                                           | 6.73066202234888  | -0.00105118671261 | 1.79331512245278  | C                                                            | 6.76287698128197  | 0.00078511682899  | 1.82907169067949  |
| C                                           | 4.00209872825899  | 0.00060230701163  | -1.46369400618688 | C                                                            | 4.03464740644743  | -0.00046945851285 | -1.42678289552608 |
| C                                           | 3.02630183982268  | -0.00001492433897 | 1.30449780013608  | C                                                            | 3.07106109113920  | 0.00033045694095  | 1.30299962822170  |
| C                                           | 2.11989666076503  | 0.00016834942749  | 0.17161659888992  | C                                                            | 2.13094861189068  | 0.00001988534951  | 0.20563002286081  |
| C                                           | 2.58328665731333  | 0.00061205009328  | -1.16377759592285 | C                                                            | 2.59875788587307  | -0.00035137153383 | -1.11176737443407 |
| C                                           | 1.65562232820208  | 0.00087306860619  | -2.21286392700411 | C                                                            | 1.68347165211837  | -0.00065236808701 | -2.16387750928728 |
| H                                           | 2.02440090840473  | 0.00114509874673  | -3.22839069666199 | H                                                            | 2.07354113356617  | -0.00096759574977 | -3.17207585630701 |
| C                                           | 0.30702747692251  | 0.00075203254747  | -1.96311041137749 | C                                                            | 0.33292830311377  | -0.00059416785038 | -1.92257054373204 |
| C                                           | -0.13606207219834 | 0.00038828644038  | -0.63157078694051 | C                                                            | -0.12631872763194 | -0.00018727205313 | -0.60480678002164 |
| C                                           | 0.74579854434776  | 0.00010942166018  | 0.41327179894269  | C                                                            | 0.74949419921984  | 0.00009022190072  | 0.44984045826259  |
| H                                           | 8.25703660887811  | -0.00052840460095 | 0.27555152646291  | H                                                            | 8.28886339949462  | 0.00058818795341  | 0.31252113249471  |
| H                                           | 6.64006504779887  | 0.00053662203227  | -1.59552165936452 | H                                                            | 6.65716933107161  | -0.00010781028304 | -1.55652933853036 |
| H                                           | 4.99728951783933  | -0.00134337540699 | 3.05769519837806  | H                                                            | 5.05453315319330  | 0.00093046362924  | 3.11307736418784  |
| H                                           | 7.43508235489103  | -0.00155083390009 | 2.61428598329807  | H                                                            | 7.46800211527016  | 0.00110270315615  | 2.64923705011375  |
| H                                           | -0.41073093642822 | 0.00094379656581  | -2.77197029569578 | H                                                            | -0.37916380328038 | -0.00088209410433 | -2.73612461687427 |
| H                                           | 0.39809807775347  | -0.00015837218872 | 1.43759393072833  | H                                                            | 0.36985597665266  | 0.00039023381083  | 1.46194033737093  |
| O                                           | 2.61051190559632  | -0.00169232526242 | 2.47191870141325  | O                                                            | 2.64840463893741  | 0.00038814304431  | 2.49897652314447  |
| O                                           | 4.42738366187831  | 0.00175210935142  | -2.63342992764304 | O                                                            | 4.43621562247579  | -0.00053554864801 | -2.58205969186570 |
| O                                           | -4.17044876217877 | 0.00106163679605  | 2.14535819250881  | O                                                            | -3.79128376744908 | 0.00053269641658  | 2.28613636346463  |
| S                                           | -4.41521790312056 | 0.00016043105306  | 0.72915216396117  | S                                                            | -4.26477645702160 | 0.00018930721482  | 0.92607676814848  |
| O                                           | -5.77585374998764 | -0.00042165672759 | 0.27422557246801  | O                                                            | -5.68606428389536 | 0.00012264536704  | 0.70922433324821  |
| <b>Coordinates from T<sub>2</sub> state</b> |                   |                   |                   | <b>Coordinates from the T<sub>2</sub>/T<sub>1</sub> MECP</b> |                   |                   |                   |
| C                                           | -2.24952854642434 | 3.59049007522015  | -0.81439797028226 | C                                                            | -2.22977366917476 | 3.58770772648976  | -0.80164495469494 |
| C                                           | -1.56593070609968 | 2.39497899342309  | -0.76203988446691 | C                                                            | -1.55098254662630 | 2.38963301207506  | -0.74624317142584 |
| C                                           | -2.20333451952690 | 1.22709164599325  | -0.33075884666825 | C                                                            | -2.19578161314204 | 1.22311358688567  | -0.32192892838318 |
| C                                           | -3.53339379030308 | 1.34024240088010  | 0.08057032741855  | C                                                            | -3.52860645853486 | 1.34077107174920  | 0.07953043773815  |
| C                                           | -4.22407342813609 | 2.54177187236663  | 0.00217011200483  | C                                                            | -4.21416203915853 | 2.54499716609361  | -0.00177994231792 |
| C                                           | -3.58757527646374 | 3.67434411457060  | -0.45142816094974 | C                                                            | -3.57015783698011 | 3.67603641895138  | -0.44851518113141 |
| C                                           | -3.53257387967124 | -1.34040455152661 | 0.08173677444831  | C                                                            | -3.53829579703863 | -1.33942542833501 | 0.07436620632643  |
| C                                           | -2.20259003957077 | -1.22679464088315 | -0.32969975979042 | C                                                            | -2.20446766285112 | -1.23005004187976 | -0.32621272310116 |
| C                                           | -1.56447544692344 | -2.39466620232033 | -0.75998205166104 | C                                                            | -1.56784434560584 | -2.39981923614708 | -0.75394991487194 |

|                                                                             |                   |                   |                   |   |                   |                   |                   |
|-----------------------------------------------------------------------------|-------------------|-------------------|-------------------|---|-------------------|-------------------|-------------------|
| H                                                                           | -0.53100929918779 | -2.36372333009405 | -1.06548595004920 | H | -0.53164597215100 | -2.37263985905101 | -1.05032012698116 |
| C                                                                           | -2.24732391982757 | -3.59065219558931 | -0.81124526586256 | C | -2.25541750700508 | -3.59261346057915 | -0.81444466992540 |
| C                                                                           | -3.58529962892464 | -3.67502105916813 | -0.44814290496195 | C | -3.59674346984585 | -3.67227888834304 | -0.46282444219471 |
| C                                                                           | -4.22249764633303 | -2.54243774712504 | 0.00444042090957  | C | -4.23259243958419 | -2.53828378456200 | -0.01193626647436 |
| H                                                                           | -1.72764493025056 | 4.47361634916109  | -1.15780405048403 | H | -1.70210858887885 | 4.46944507447784  | -1.13972844604591 |
| H                                                                           | -0.53242901130743 | 2.36441022745578  | -1.06746686903797 | H | -0.51535831055769 | 2.35595304972862  | -1.04396519892983 |
| H                                                                           | -5.25774648379544 | 2.56826979942910  | 0.31860064189955  | H | -5.25018445677889 | 2.57456326283635  | 0.30660525873564  |
| H                                                                           | -4.11752158853503 | 4.61409966865226  | -0.50938835313254 | H | -4.09625445613615 | 4.6178085860711   | -0.50890344193708 |
| H                                                                           | -1.72490105571462 | -4.47375774620289 | -1.15388276726060 | H | -1.73400117143818 | -4.47698138607613 | -1.15534114108402 |
| H                                                                           | -4.11465806532210 | -4.61516125452400 | -0.50522914922968 | H | -4.12984565883252 | -4.60982372997246 | -0.52740235037118 |
| H                                                                           | -5.25614612879039 | -2.56929410239149 | 0.32092094609585  | H | -5.26895838018055 | -2.56153120589189 | 0.29582834769123  |
| N                                                                           | -1.53641975179628 | 0.00035016268053  | -0.33740512792579 | N | -1.53340690017492 | -0.00588490139203 | -0.32720405248203 |
| C                                                                           | 7.23187627866985  | -0.00130043321400 | 0.50988219753387  | C | 7.22555801412711  | 0.01872635409472  | 0.46785175297712  |
| C                                                                           | 6.34220603988073  | -0.00067131032475 | -0.53933407136744 | C | 6.35224476356142  | 0.00836253011911  | -0.56812980031735 |
| C                                                                           | 4.96571283267288  | 0.00014297384267  | -0.29855242738960 | C | 4.95356948048528  | -0.00065800629526 | -0.32314295751635 |
| C                                                                           | 4.49631534904516  | 0.00032794368440  | 1.03350138777617  | C | 4.47592820139210  | 0.00218269808945  | 1.05581346550127  |
| C                                                                           | 5.41813665151048  | -0.00031411037457 | 2.08327921662187  | C | 5.40251826829739  | 0.01231380068462  | 2.09245504830927  |
| C                                                                           | 6.76916805023598  | -0.00112356175072 | 1.82349353647775  | C | 6.74900258186591  | 0.02120607323726  | 1.82371341838769  |
| C                                                                           | 4.02281427732192  | 0.00067835223250  | -1.40063313950212 | C | 4.03232972510074  | -0.00963401179491 | -1.41822020411086 |
| C                                                                           | 3.06991343630040  | 0.00116285329030  | 1.30317830506055  | C | 3.05424284788262  | -0.00251633558080 | 1.35074722536460  |
| C                                                                           | 2.12884876791638  | 0.00093926344141  | 0.19829139996979  | C | 2.13243824776657  | -0.00667398039725 | 0.20276636993165  |
| C                                                                           | 2.59744697988627  | 0.00073830239015  | -1.13326385700342 | C | 2.59824695555737  | -0.01076502379552 | -1.11481289533407 |
| C                                                                           | 1.67445631695046  | 0.00050668255711  | -2.18422879605123 | C | 1.68052488612386  | -0.01512986434523 | -2.16912601741433 |
| H                                                                           | 2.03363458768570  | 0.00032679495027  | -3.20232383355328 | H | 2.05558887943294  | -0.01857576896683 | -3.18213092236643 |
| C                                                                           | 0.32595070692950  | 0.00041919379392  | -1.92673616939707 | C | 0.33209814944514  | -0.01408860676790 | -1.91557564775197 |
| C                                                                           | -0.13136020322879 | 0.00060721588976  | -0.61028432233025 | C | -0.12745137772323 | -0.00948693712419 | -0.59807375945469 |
| C                                                                           | 0.75244248955807  | 0.00088975839774  | 0.43967889659005  | C | 0.75860662549536  | -0.00664752133703 | 0.44848321234078  |
| H                                                                           | 8.29489239390180  | -0.00198114756964 | 0.31194851847422  | H | 8.29127950059649  | 0.02578635341646  | 0.28545126069496  |
| H                                                                           | 6.69828972611563  | -0.00085231592238 | -1.55878806216281 | H | 6.68680657634093  | 0.00739802276543  | -1.59501046957728 |
| H                                                                           | 5.05574712341459  | -0.00018834523276 | 3.10055763476797  | H | 5.03271219810305  | 0.01541552102917  | 3.10790594990915  |
| H                                                                           | 7.47350996711083  | -0.00165068915546 | 2.64385985208303  | H | 7.46449306040635  | 0.03109033488105  | 2.63433844397772  |
| H                                                                           | -0.38961484439630 | 0.00016267754905  | -2.73757765360310 | H | -0.38312472303092 | -0.01658879751173 | -2.72715947088763 |
| H                                                                           | 0.37997578933588  | 0.00101550525499  | 1.45355395764256  | H | 0.40448199071828  | -0.00333313749477 | 1.46971920300569  |
| O                                                                           | 2.65037050738009  | 0.00071424519870  | 2.48066566123418  | O | 2.64184215290105  | -0.00325002192059 | 2.51140778330093  |
| O                                                                           | 4.43558363249794  | 0.00027024052034  | -2.58322872255386 | O | 4.44689489867450  | -0.01448285250713 | -2.59865091242375 |
| O                                                                           | -3.86374570256375 | 0.00073608294199  | 2.26044823355189  | O | -3.88558305085268 | -0.00198539137203 | 2.25348685277485  |
| S                                                                           | -4.29655274855364 | 0.00003260205618  | 0.88687461158031  | S | -4.30440168813859 | 0.00195076650505  | 0.87567627345708  |
| O                                                                           | -5.71124751267392 | -0.00050618445487 | 0.62901887453626  | O | -5.71656013385310 | 0.00752186672379  | 0.60359483908262  |
| <b>Coordinates from the S<sub>1</sub>/ T<sub>1</sub>/T<sub>2</sub> MECP</b> |                   |                   |                   |   |                   |                   |                   |
| C                                                                           | -2.33834384176855 | 3.53828361569689  | -0.95160023102935 |   |                   |                   |                   |
| C                                                                           | -1.61881668266893 | 2.36645288556689  | -0.83295988061218 |   |                   |                   |                   |
| C                                                                           | -2.20587331185188 | 1.21980228042471  | -0.30070501152200 |   |                   |                   |                   |
| C                                                                           | -3.52418087814724 | 1.33267432044685  | 0.13223074789999  |   |                   |                   |                   |
| C                                                                           | -4.26064170359131 | 2.50521447001155  | -0.02192096247994 |   |                   |                   |                   |

|   |                   |                   |                   |
|---|-------------------|-------------------|-------------------|
| C | -3.67080288448209 | 3.61710332059679  | -0.56625707625122 |
| C | -3.53186017648264 | -1.33109557276311 | 0.12956553185467  |
| C | -2.21275367731165 | -1.22508225699867 | -0.30272610408238 |
| C | -1.63217528077427 | -2.37411071414620 | -0.83692429140739 |
| H | -0.60507276405566 | -2.36447020506950 | -1.16496105011551 |
| C | -2.35837623799240 | -3.54158580561453 | -0.95782592483989 |
| C | -3.69146657792259 | -3.61332195409592 | -0.57326096187832 |
| C | -4.27509209385366 | -2.49901758422758 | -0.02716855161750 |
| H | -1.84831654132238 | 4.40669426959543  | -1.37234584316603 |
| H | -0.59187885719947 | 2.35154782727676  | -1.16135277335828 |
| H | -5.28927114243136 | 2.511671770738924 | 0.31119579384317  |
| H | -4.22682005059394 | 4.53626354052351  | -0.68119708236438 |
| H | -1.87325467963741 | -4.41204378971627 | -1.38002121632298 |
| H | -4.25281935025439 | -4.52897121035001 | -0.69028064138531 |
| H | -5.30395232016764 | -2.50513141683068 | 0.30538378224404  |
| N | -1.51576409239756 | -0.00469710177390 | -0.19310126775356 |
| C | 7.29475906497535  | 0.02342013046038  | 0.50247106765513  |
| C | 6.37644212672014  | 0.01202630808856  | -0.53040897139191 |
| C | 5.01653863358194  | -0.00023984452024 | -0.26177008161235 |
| C | 4.58252652612000  | -0.00126460681663 | 1.06325358958450  |
| C | 5.50492390061652  | 0.00768681442697  | 2.10724907507170  |
| C | 6.85543022882409  | 0.02097720693721  | 1.81911193187471  |
| C | 4.05811568632126  | -0.01168634808392 | -1.39070188096663 |
| C | 3.15048059898105  | -0.01067195527382 | 1.33889101213281  |
| C | 2.14507497041000  | -0.01046604290215 | 0.24447235304593  |
| C | 2.59854324212468  | -0.01166734199549 | -1.06121619226439 |
| C | 1.67597964461514  | -0.01033252034866 | -2.09683176012540 |
| H | 2.04318935532641  | -0.01038111976476 | -3.11310801778704 |
| C | 0.32374136168927  | -0.00867151450208 | -1.82174048299682 |
| C | -0.12611826291206 | -0.00784572538465 | -0.51106519945672 |
| C | 0.78740256298766  | -0.00822112918311 | 0.52873173706071  |
| H | 8.35311051169059  | 0.03369731007515  | 0.28324862015307  |
| H | 6.69419165605286  | 0.01281028536667  | -1.56362880377441 |
| H | 5.16334880243253  | 0.00609907655058  | 3.13252261589119  |
| H | 7.57112680936496  | 0.02944858968186  | 2.62962899959870  |
| H | -0.39575394142619 | -0.00790506844775 | -2.62902356911437 |
| H | 0.42410682895805  | -0.00659141949370 | 1.54612417865242  |
| O | 2.74051624835969  | -0.02134334793190 | 2.51068938733372  |
| O | 4.43029218171132  | -0.01845387963025 | -2.54127275678941 |
| O | -3.66577665433698 | -0.00101533098101 | 2.34337354121634  |
| S | -4.21591925908541 | 0.00191234405389  | 1.00964437846697  |
| O | -5.65104192919584 | 0.00628757367654  | 0.88495158288590  |
